# Supplementary material for: Improving binding entropy by higher ligand symmetry? – A case study with human matriptase
Source: Royal Society of Chemistry journal article supplement (doi:10.1039/d3md00125c), 2023-01-01

## ARTICLE

# Improving binding entropy by higher ligand symmetry? – A case study with human matriptase.

Stefan J. Hammerschmidt<sup>a,†</sup>, Hannah Maus<sup>a,†</sup>, Annabelle C. Weldert<sup>a,†</sup>, Michael Gütschow<sup>b</sup>, Christian Kersten<sup>a,\*</sup>

<sup>a</sup>Institute of Pharmaceutical and Biomedical Sciences, Johannes Gutenberg-University, Staudingerweg 5, 55128 Mainz, Germany

<sup>b</sup>Pharmaceutical Institute, Pharmaceutical & Medicinal Chemistry, University of Bonn, An der Immenburg 4, 53121 Bonn, Germany

<sup>†</sup>Authors contributed equally.

\* E-Mail: [kerstec@uni-mainz.de](mailto:kerstec@uni-mainz.de)

## Content

### Supplementary figures

Figure S1. Electrostatic surface of the MT-SP1 binding site and 2D structure of cpd **15**.

Figure S2. IC<sub>50</sub> fits of enzyme inhibition assay data.

Figure S3. Evaluation of pK<sub>a</sub> values amines and amidines used in this study.

Figure S4. K<sub>M</sub>-determinations of the MT-SP1 cleavage of Boc-LRR-AMC at different pH-Values.

Figure S5. Thermograms and isotherms of ITC experiments.

Figure S6. Docking validation.

Figure S7. SDS-PAGE analysis of the MT-SP1 purification and autoactivation process.

### Supplementary tables

Table S1. Symmetry point groups of inhibitors **1–6**.

Table S2. FlexX docking scores for poses resembling possible solutions.

Table S3. K<sub>M</sub> values of Boc-LRR-AMC, and IC<sub>50</sub> and K<sub>i</sub> values of **3–6** in dependence of buffer pH.

Table S4. ITC results including errors from direct titrations. Experiments were performed at least in triplicates.

Table S5. Comparison of calculated and experimental changes in ΔG assuming equal K<sub>a,inc</sub> for inhibitors **4–6**.

Table S6. Used concentrations for direct titrations.

### Additional References

### Spectral Appendix

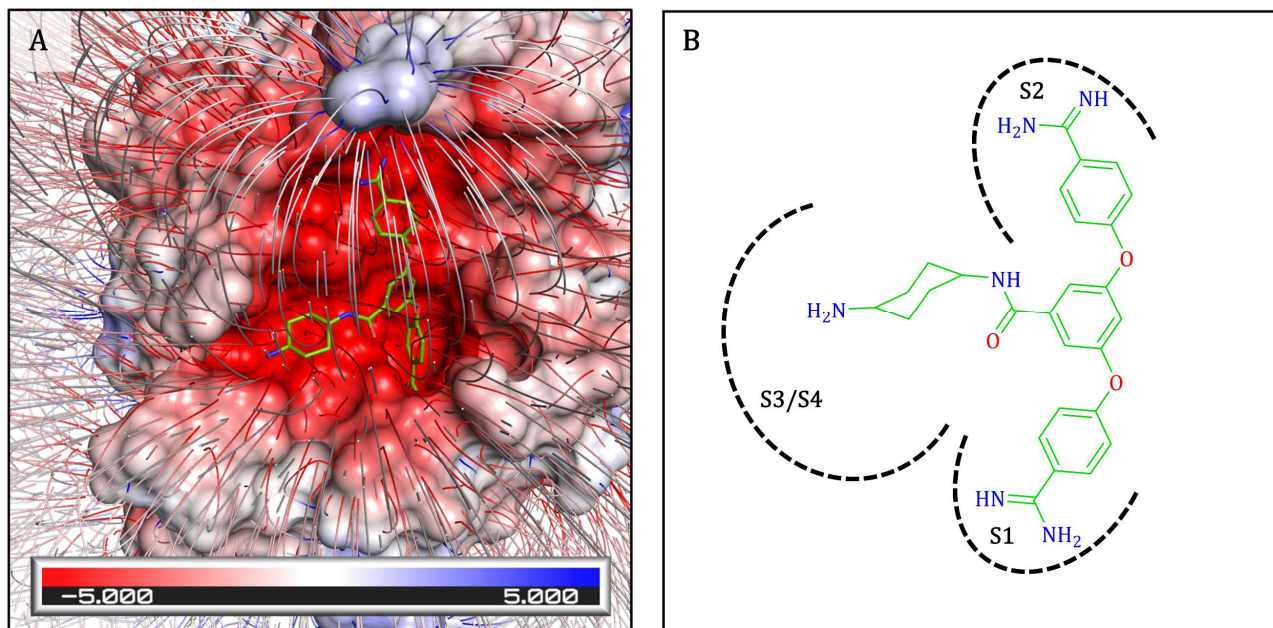

Figure S1. Electrostatic surface of the MT-SP1 binding site and 2D structure of cpd **15**. **A** The electrostatic surface and electric field lines (red to blue from  $-5.000$  to  $5.000$  kBT/ec) of the protease are exemplarily shown for the complex structure (PDB ID: 4O9V)(1) with inhibitor **15** (*N*-(4-aminocyclohexyl)-3,5-bis(4-carbamimidoylphenoxy)benzamide) depicted as sticks with green carbon atoms. Calculated with the Adaptive Poisson-Boltzmann Solver (APBS)(2) plugin within PyMOL.(3) **B** 2D structure of inhibitor **15** with indicated binding sites.

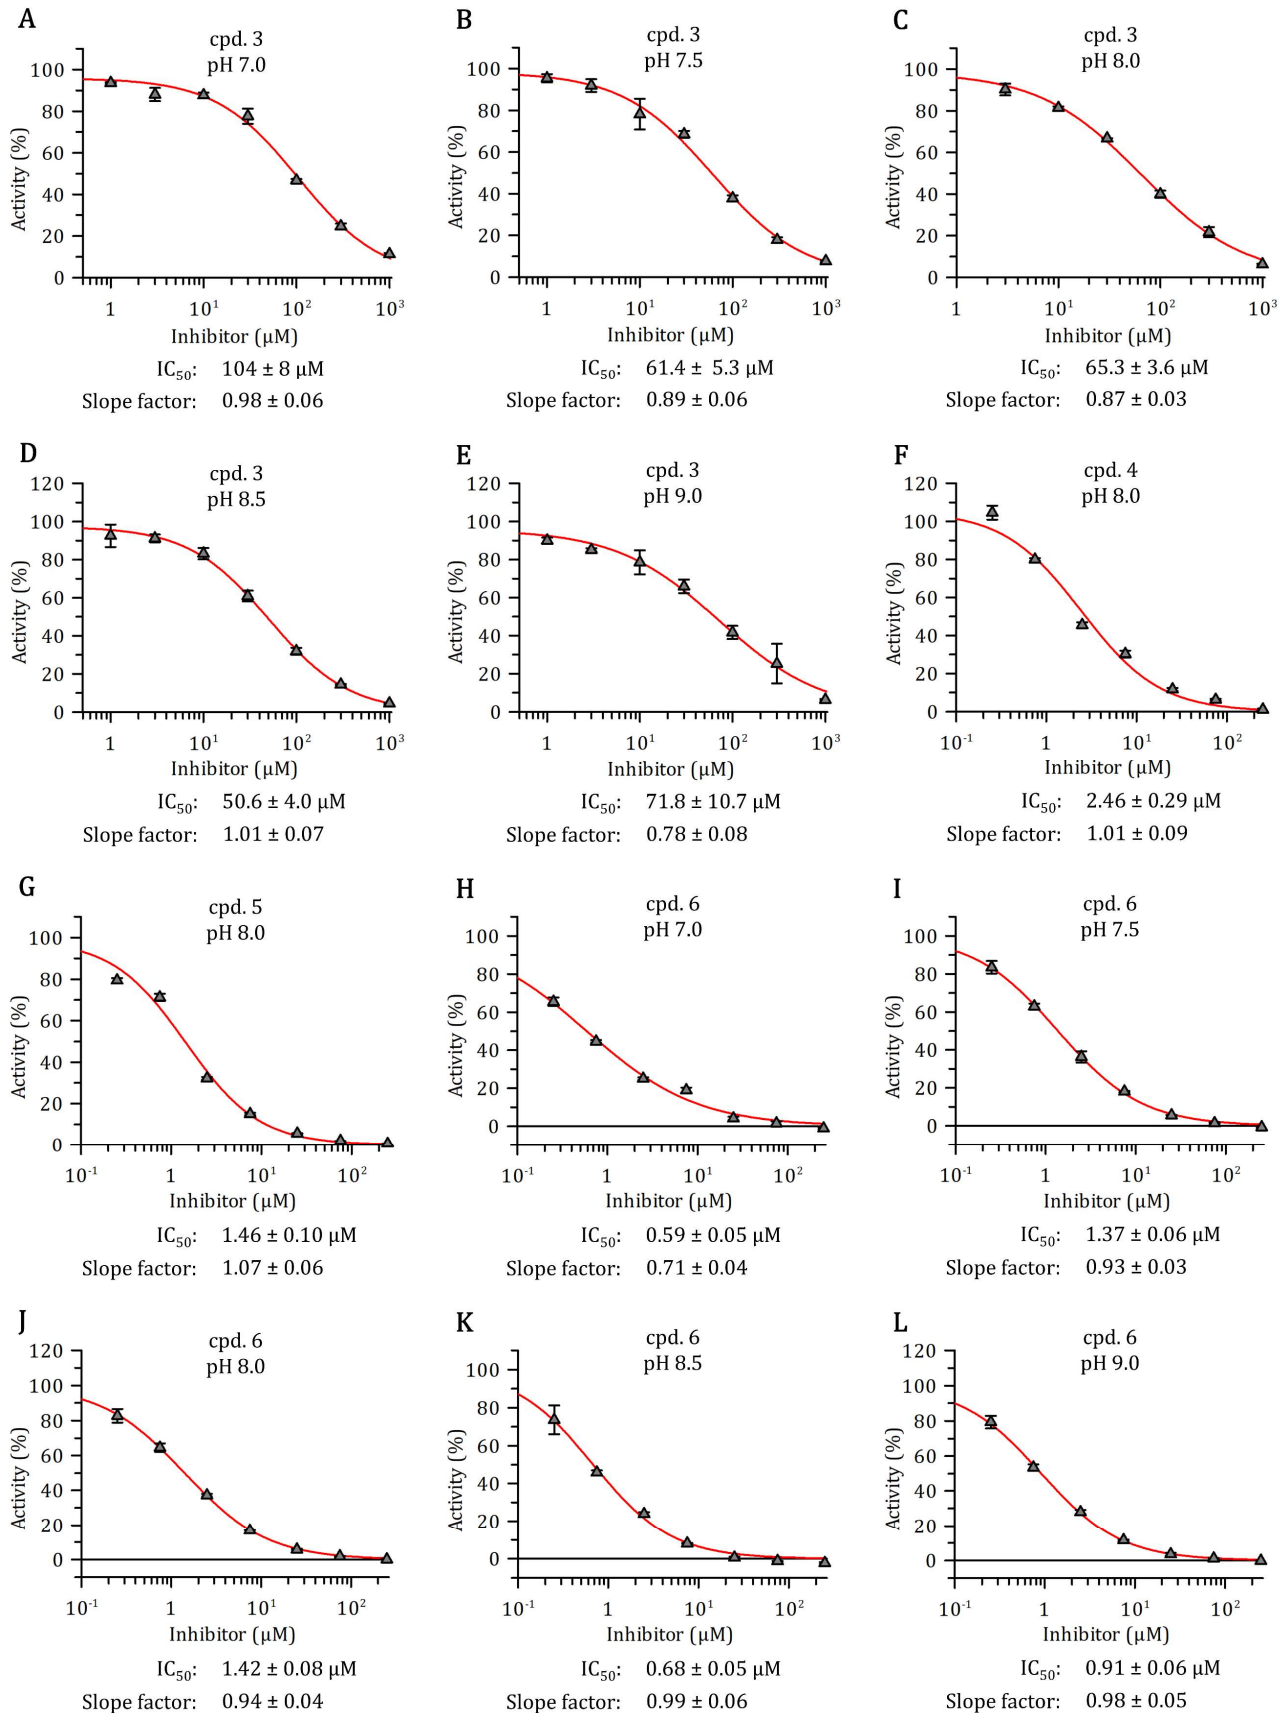

Figure S2.  $\text{IC}_{50}$  fits of enzyme inhibition assay data. A–E Cpd 3 at pH 7.0–9.0. F, G Cpd 4 and 5 at pH 8.0. H–L Cpd 6 at pH 7.0–9.0. Errors of technical triplicates are indicated as bars. Figure generated with GRAPHIT (Version 5.0.13; Erithacus Software Limited, East Grinstead, UK).(4)

**Protonation states.** To evaluate if the protonation states of the moieties determine the different affinities of amines and amidines, we calculated the  $pK_a$  values of ligands **1–6** (Figure S3A). Through the symmetry of the ligands,  $pK_a$  values for the same functional groups can be exchanged and should be understood as those of successive protonation events. The  $pK_a$  values range from 8.78 to 9.74 for amines and 11.19 to 12.15 for the protonated states of the amidines. Hence, at the experimental pH of 8.0, the great majority should be fully protonated, as even for cpd **3** with the weakest basicity, more than 80% is fully protonated (Figure S3B–F).

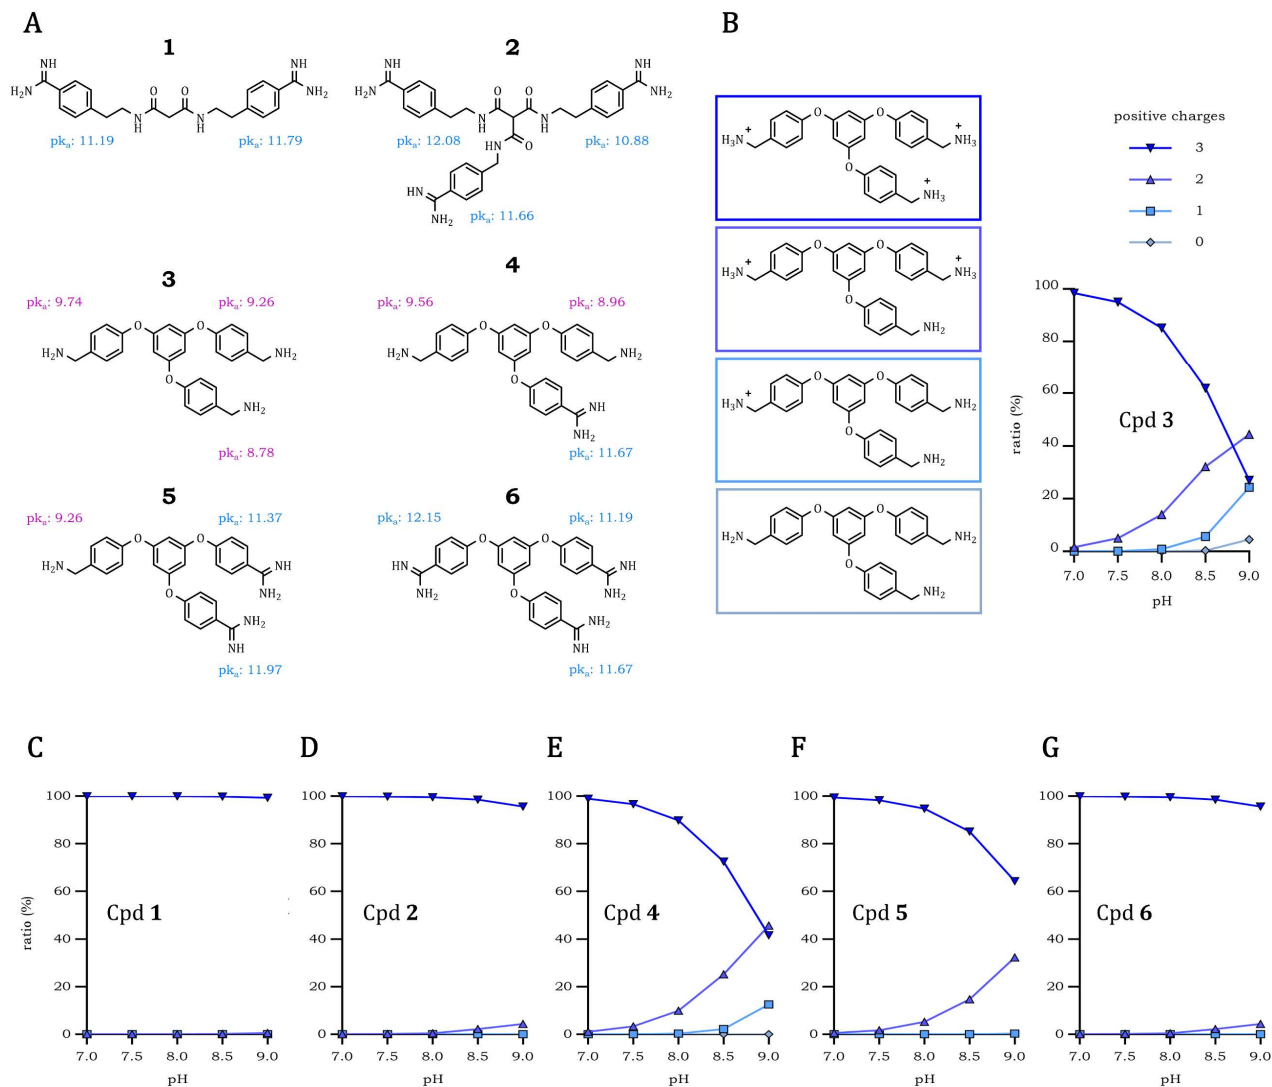

Figure S3. Evaluation of  $pK_a$  values amines and amidines used in this study. Calculated with MarvinSketch.(5) **A**  $pK_a$  of amines (purple) and amidines (blue) of inhibitors **1–6**. **B** Protonation states of cpd **3** and their occurrences at relevant pH values of 7.0–9.0, predicted by MarvinSketch. From dark blue to pale blue: fully protonated species to not protonated state. **C–G** Protonation states of cpds **1, 2, 4, 5, and 6**, respectively, with only two possible positions for protonation being present in inhibitor **1** and inhibitors **2–6** featuring three basic sites for protonation.

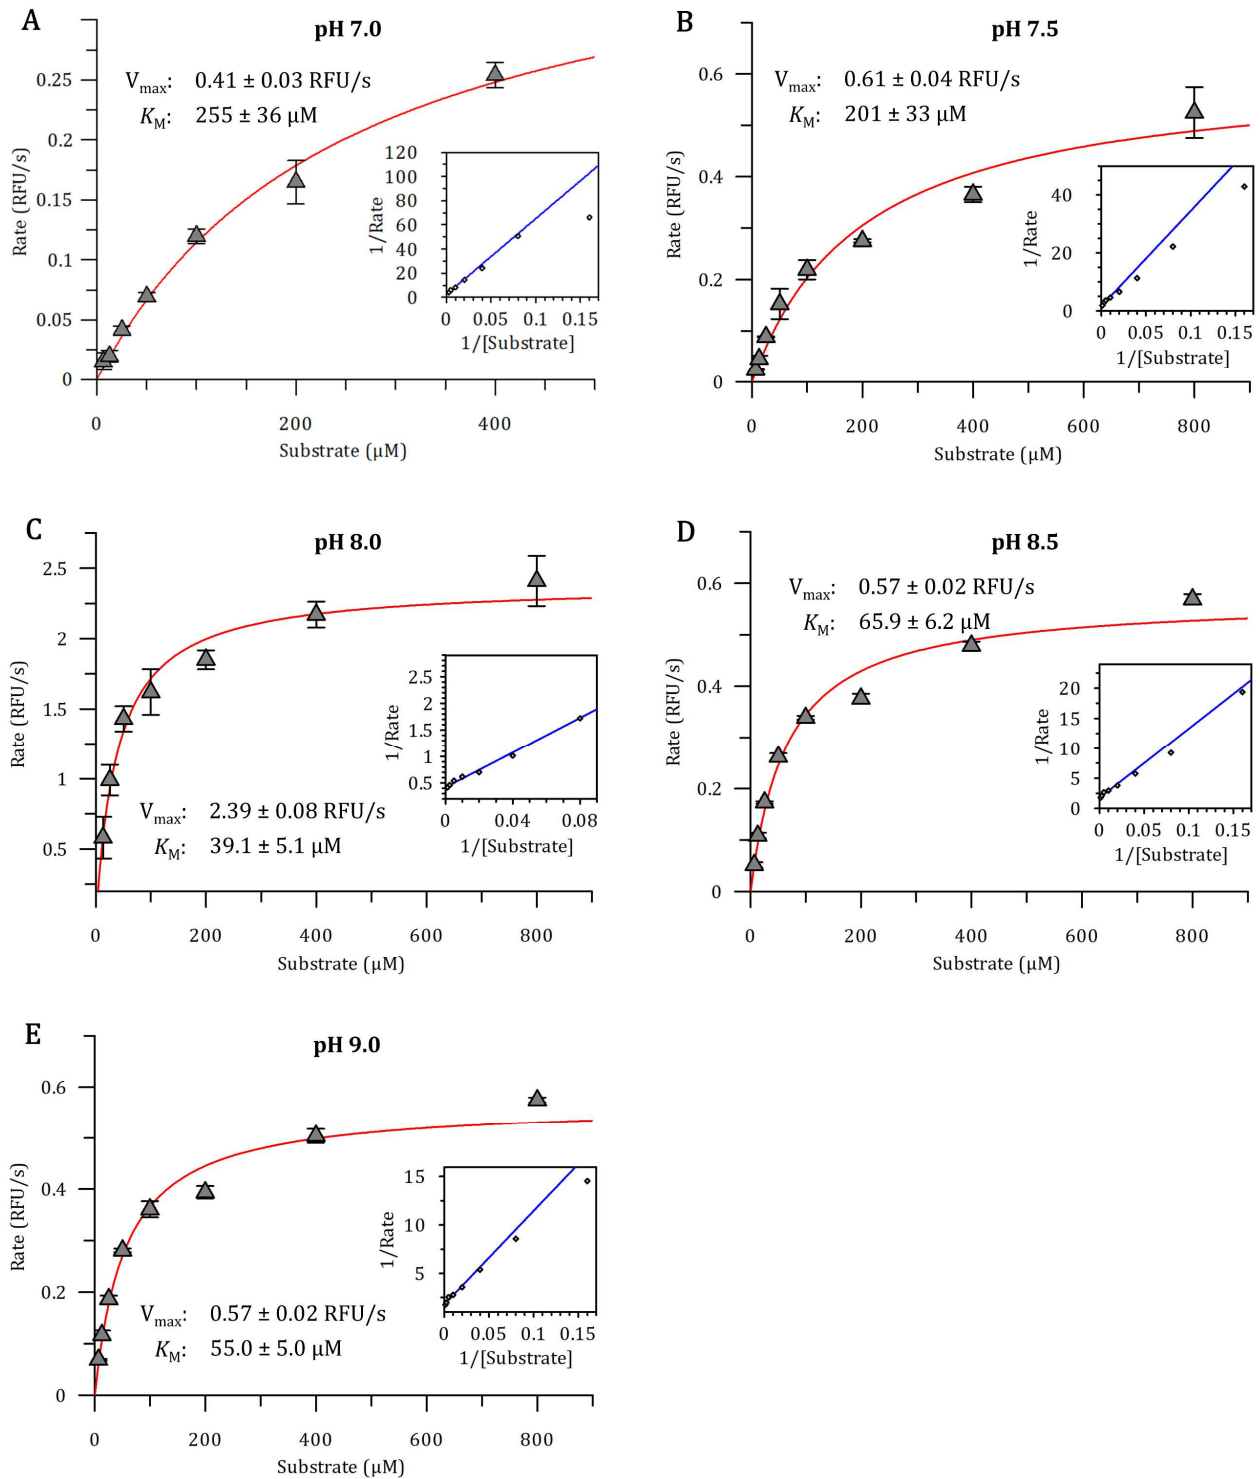

Figure S4.  $K_M$ -determinations of the MT-SP1 cleavage of Boc-LRR-AMC at different pH-Values. **A** pH 7.0; **B** pH 7.5; **C** pH 8.0; **D** pH 8.5; **E** pH 9.0. In the smaller secondary graph, the respective linearized Lineweaver-Burk plot is given. Figure generated with GRAPHIT (Version 5.0.13; Erithacus Software Limited, East Grinstead, UK).(4)

## ITC experiments of cpd. 1 vs. MT-SP1 in TRIS.

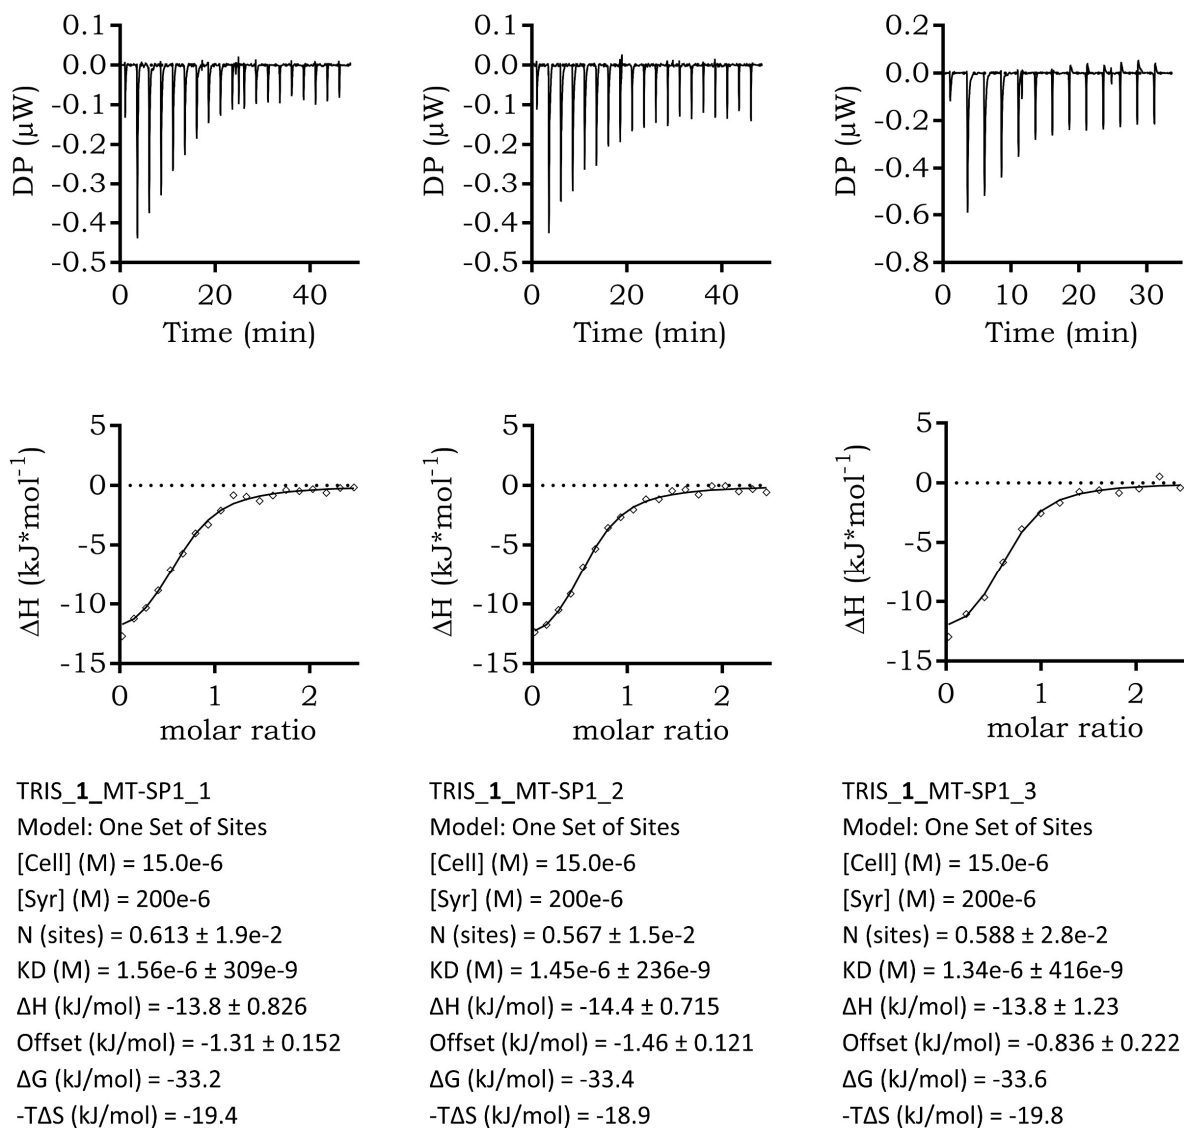Figure S5A. Thermograms and isotherms of cpd 1 vs. MT-SP1 in ITC<sub>TRIS</sub> buffer.

## ITC experiments of cpd. 2 vs. MT-SP1 in TRIS.

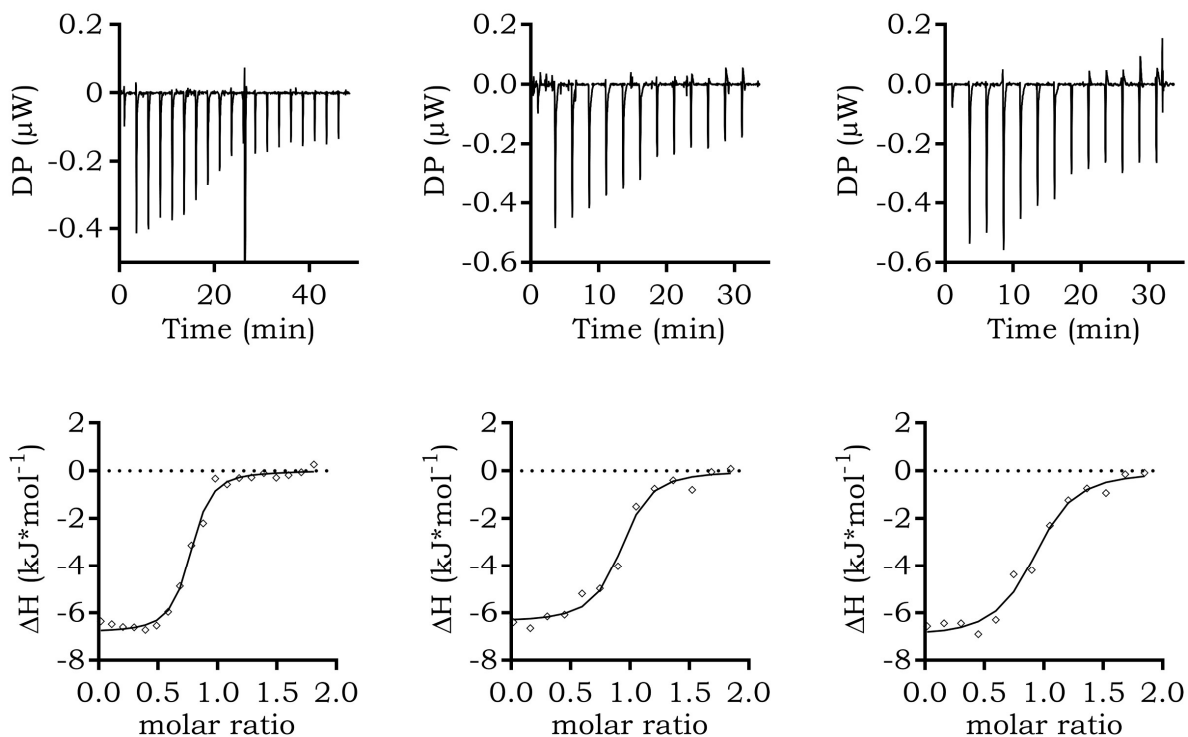

TRIS\_2\_MT-SP1\_1

Model: One Set of Sites

[Cell] (M) = 20.4e-6

[Syr] (M) = 200e-6

N (sites) = 0.740 ± 1.1e-2

KD (M) = 200e-9 ± 50.0e-9

 $\Delta H$  (kJ/mol) = -6.84 ± 0.197

Offset (kJ/mol) = -2.04 ± 0.104

 $\Delta G$  (kJ/mol) = -38.3-T $\Delta S$  (kJ/mol) = -31.4

TRIS\_2\_MT-SP1\_2

Model: One Set of Sites

[Cell] (M) = 20.0e-6

[Syr] (M) = 200e-6

N (sites) = 0.875 ± 2.8e-2

KD (M) = 332e-9 ± 155e-9

 $\Delta H$  (kJ/mol) = -6.40 ± 0.419

Offset (kJ/mol) = -1.00 ± 0.237

 $\Delta G$  (kJ/mol) = -37.0-T $\Delta S$  (kJ/mol) = -30.6

TRIS\_2\_MT-SP1\_3

Model: One Set of Sites

[Cell] (M) = 20.0e-6

[Syr] (M) = 200e-6

N (sites) = 0.892 ± 4.1e-2

KD (M) = 645e-9 ± 326e-9

 $\Delta H$  (kJ/mol) = -7.06 ± 0.644

Offset (kJ/mol) = -0.954 ± 0.346

 $\Delta G$  (kJ/mol) = -35.4-T $\Delta S$  (kJ/mol) = -28.3Figure S5B. Thermograms and isotherms of cpd 2 vs. MT-SP1 in ITC<sub>TRIS</sub> buffer.

## ITC experiments of cpd. 3 vs. MT-SP1 in HEPES.

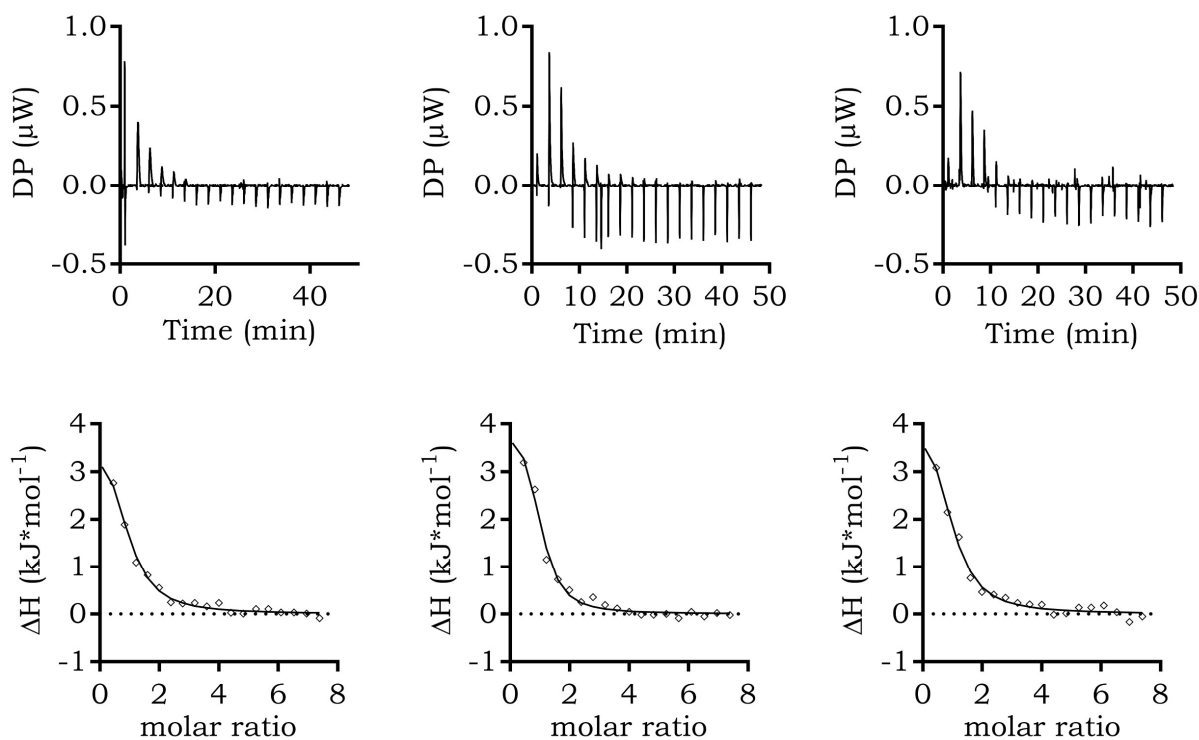

HEPES\_3\_MT-SP1\_1

Model: One Set of Sites

[Cell] (M) = 50.0e-6

[Syr] (M) = 2.00e-3

N (sites) = 0.850

KD (M) = 15.6e-6 ± 2.82e-6

ΔH (kJ/mol) = 4.32 ± 0.264

Offset (kJ/mol) = 9.7e-2 ± 3.1e-2

ΔG (kJ/mol) = -27.5

-TΔS (kJ/mol) = -31.8

HEPES\_3\_MT-SP1\_2

Model: One Set of Sites

[Cell] (M) = 50.0e-6

[Syr] (M) = 2.00e-3

N (sites) = 0.904 ± 6.3e-2

KD (M) = 7.38e-6 ± 2.53e-6

ΔH (kJ/mol) = 4.24 ± 0.465

Offset (kJ/mol) = 0.114 ± 4.2e-2

ΔG (kJ/mol) = -29.3

-TΔS (kJ/mol) = -33.6

HEPES\_3\_MT-SP1\_3

Model: One Set of Sites

[Cell] (M) = 50.0e-6

[Syr] (M) = 2.00e-3

N (sites) = 0.891 ± 0.105

KD (M) = 15.0e-6 ± 5.46e-6

ΔH (kJ/mol) = 4.74 ± 0.857

Offset (kJ/mol) = 4.0e-2 ± 4.8e-2

ΔG (kJ/mol) = -27.6

-TΔS (kJ/mol) = -32.3

Figure S5C. Thermograms and isotherms of cpd 3 vs. MT-SP1 in ITC<sub>HEPES</sub> buffer.



## ITC experiments of cpd. 3 vs. MT-SP1 in TRIS.

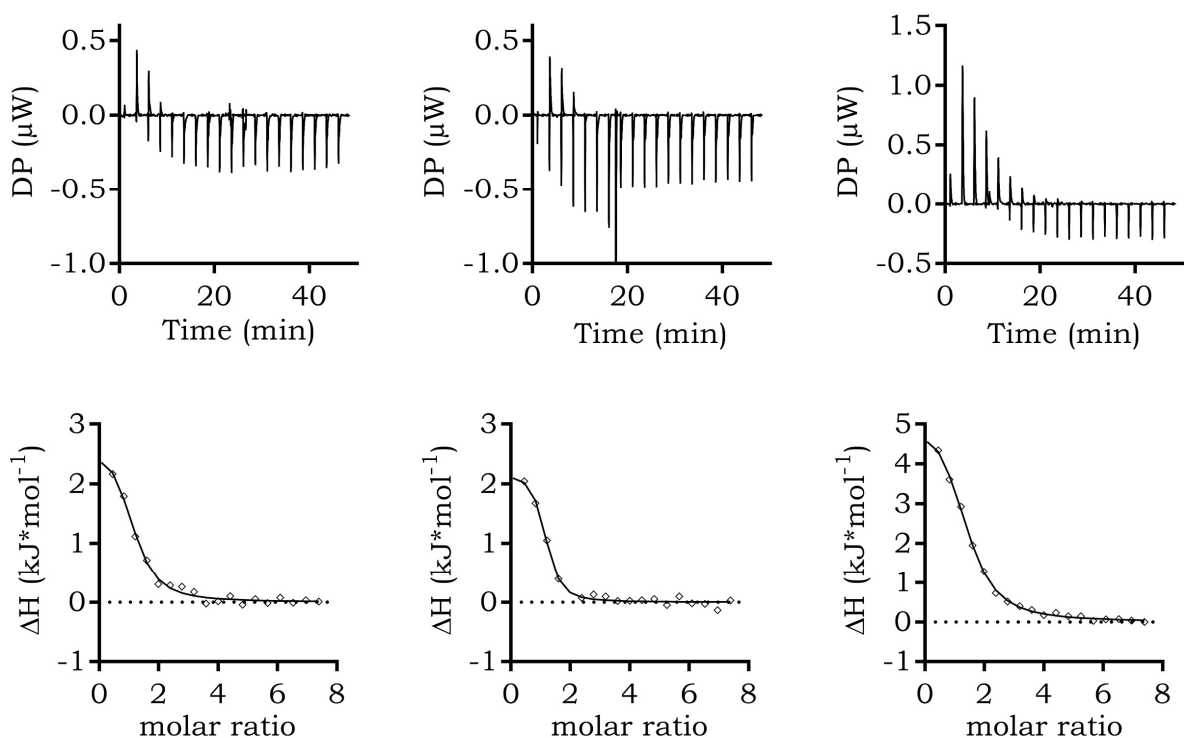

TRIS\_3\_MT-SP1\_1

Model: One Set of Sites

[Cell] (M) = 50.0e-6

[Syr] (M) = 2.00e-3

N (sites) = 1.07 ± 5.6e-2

KD (M) = 9.04e-6 ± 2.40e-6

ΔH (kJ/mol) = 2.79 ± 0.236

Offset (kJ/mol) = -0.445 ± 2.5e-2

ΔG (kJ/mol) = -28.8

-TΔS (kJ/mol) = -31.6

TRIS\_3\_MT-SP1\_2

Model: One Set of Sites

[Cell] (M) = 50.0e-6

[Syr] (M) = 2.00e-3

N (sites) = 1.04 ± 3.6e-2

KD (M) = 2.84e-6 ± 904e-9

ΔH (kJ/mol) = 2.22 ± 0.122

Offset (kJ/mol) = -0.540 ± 2.1e-2

ΔG (kJ/mol) = -31.7

-TΔS (kJ/mol) = -33.9

TRIS\_3\_MT-SP1\_3

Model: One Set of Sites

[Cell] (M) = 50.0e-6

[Syr] (M) = 2.00e-3

N (sites) = 1.34 ± 2.4e-2

KD (M) = 11.4e-6 ± 1.14e-6

ΔH (kJ/mol) = 5.38 ± 0.168

Offset (kJ/mol) = 2.8e-3 ± 2.2e-2

ΔG (kJ/mol) = -28.2

-TΔS (kJ/mol) = -33.6

Figure S5D. Thermograms and isotherms of cpd 3 vs. MT-SP1 in ITC<sub>TRIS</sub> buffer.

## ITC experiments of cpd. 4 vs. MT-SP1 in HEPES.

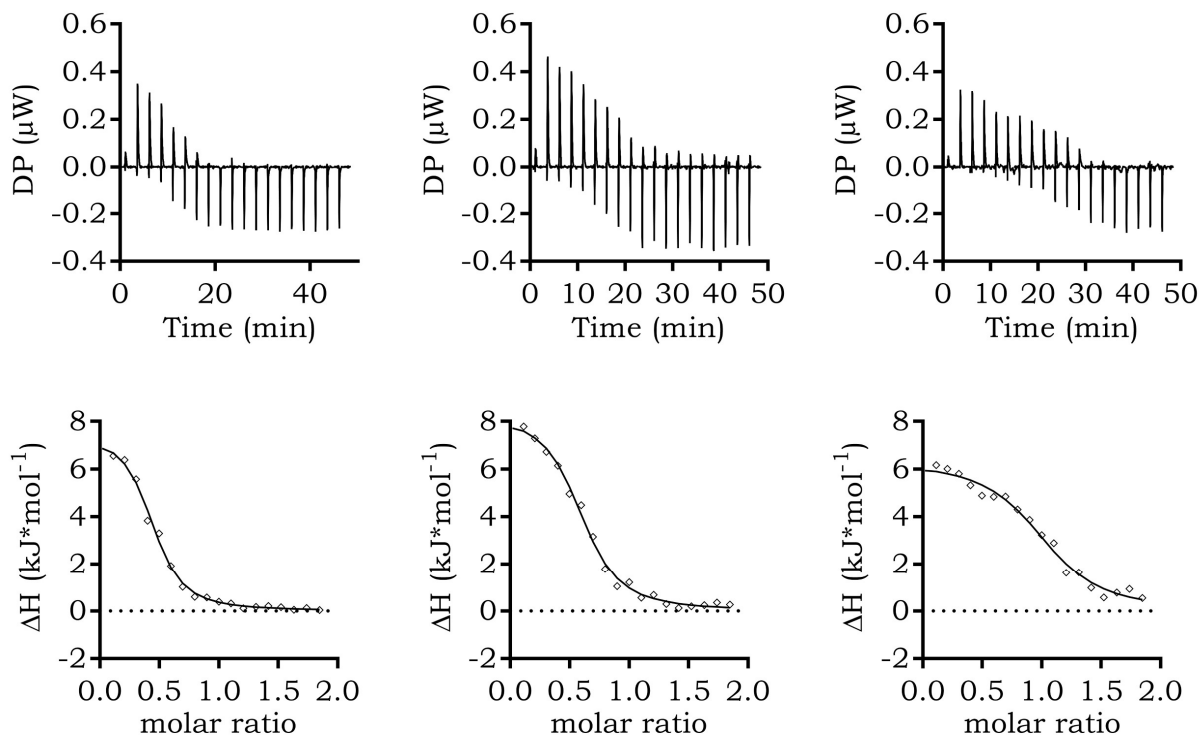

HEPES\_4\_MT-SP1\_1

Model: One Set of Sites

[Cell] (M) = 50.0e-6

[Syr] (M) = 500e-6

N (sites) =  $0.433 \pm 1.2e-2$ KD (M) =  $2.00e-6 \pm 411e-9$  $\Delta H$  (kJ/mol) =  $7.52 \pm 0.350$ Offset (kJ/mol) =  $-1.83 \pm 7.7e-2$  $\Delta G$  (kJ/mol) = -32.6

-TΔS (kJ/mol) = -40.1

HEPES\_4\_MT-SP1\_2

Model: One Set of Sites

[Cell] (M) = 50.0e-6

[Syr] (M) = 500e-6

N (sites) =  $0.595 \pm 1.5e-2$ KD (M) =  $2.31e-6 \pm 494e-9$  $\Delta H$  (kJ/mol) =  $8.34 \pm 0.381$ Offset (kJ/mol) =  $-1.37 \pm 0.120$  $\Delta G$  (kJ/mol) = -32.2

-TΔS (kJ/mol) = -40.5

HEPES\_4\_MT-SP1\_3

Model: One Set of Sites

[Cell] (M) = 50.0e-6

[Syr] (M) = 500e-6

N (sites) =  $1.03 \pm 4.7e-2$ KD (M) =  $3.18e-6 \pm 1.14e-6$  $\Delta H$  (kJ/mol) =  $6.32 \pm 0.565$ Offset (kJ/mol) =  $-2.00 \pm 0.326$  $\Delta G$  (kJ/mol) = -31.4

-TΔS (kJ/mol) = -37.7

Figure S5E. Thermograms and isotherms of cpd 4 vs. MT-SP1 in ITC<sub>HEPES</sub> buffer.

## ITC experiments of cpd. 4 vs. MT-SP1 in TRIS.

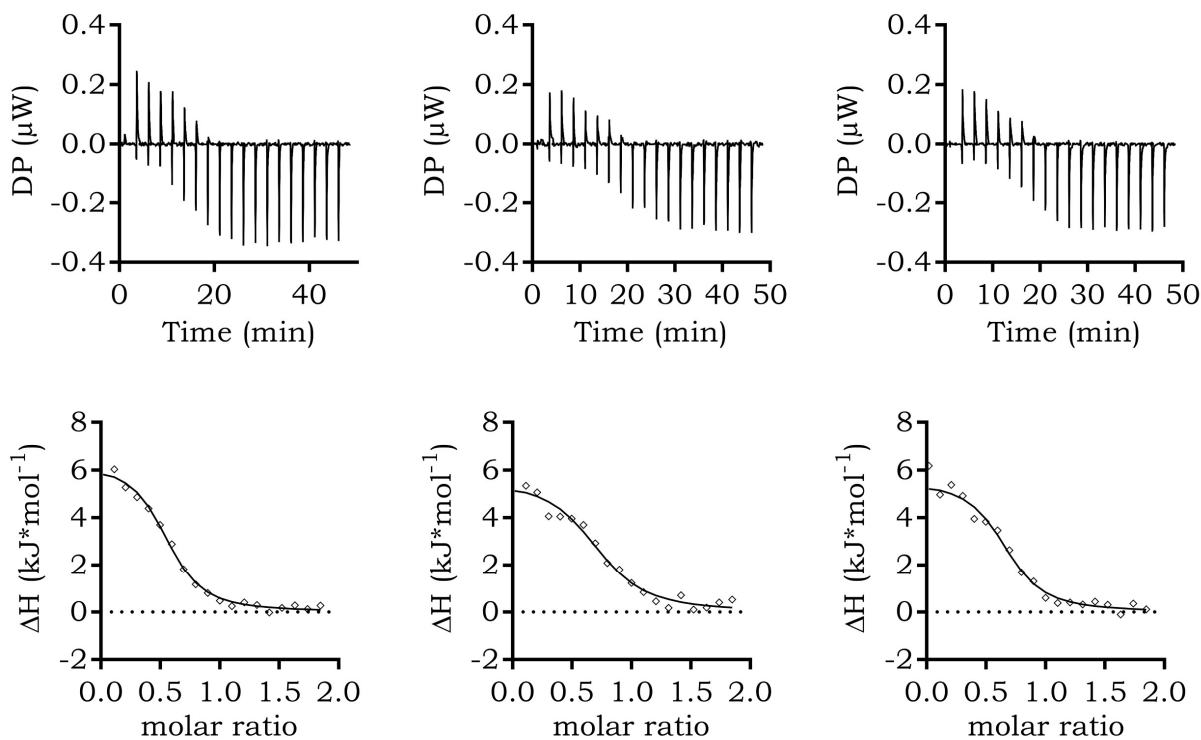

TRIS\_4\_MT-SP1\_1

Model: One Set of Sites

[Cell] (M) = 50.0e-6

[Syr] (M) = 500e-6

N (sites) = 0.551 ± 1.4e-2

KD (M) = 2.24e-6 ± 482e-9

 $\Delta H$  (kJ/mol) = 6.30 ± 0.293

Offset (kJ/mol) = -2.39 ± 8.4e-2

 $\Delta G$  (kJ/mol) = -32.3- $\Delta S$  (kJ/mol) = -38.6

TRIS\_4\_MT-SP1\_2

Model: One Set of Sites

[Cell] (M) = 50.0e-6

[Syr] (M) = 500e-6

N (sites) = 0.724 ± 4.3e-2

KD (M) = 3.26e-6 ± 1.60e-6

 $\Delta H$  (kJ/mol) = 5.60 ± 0.652

Offset (kJ/mol) = -2.51 ± 0.242

 $\Delta G$  (kJ/mol) = -31.4- $\Delta S$  (kJ/mol) = -37.0

TRIS\_4\_MT-SP1\_3

Model: One Set of Sites

[Cell] (M) = 50.0e-6

[Syr] (M) = 500e-6

N (sites) = 0.659 ± 2.3e-2

KD (M) = 2.10e-6 ± 671e-9

 $\Delta H$  (kJ/mol) = 5.55 ± 0.354

Offset (kJ/mol) = -2.40 ± 0.130

 $\Delta G$  (kJ/mol) = -32.4- $\Delta S$  (kJ/mol) = -38.0Figure S5F. Thermograms and isotherms of cpd 4 vs. MT-SP1 in ITC<sub>TRIS</sub> buffer.

## ITC experiments of cpd. 5 vs. MT-SP1 in HEPES.

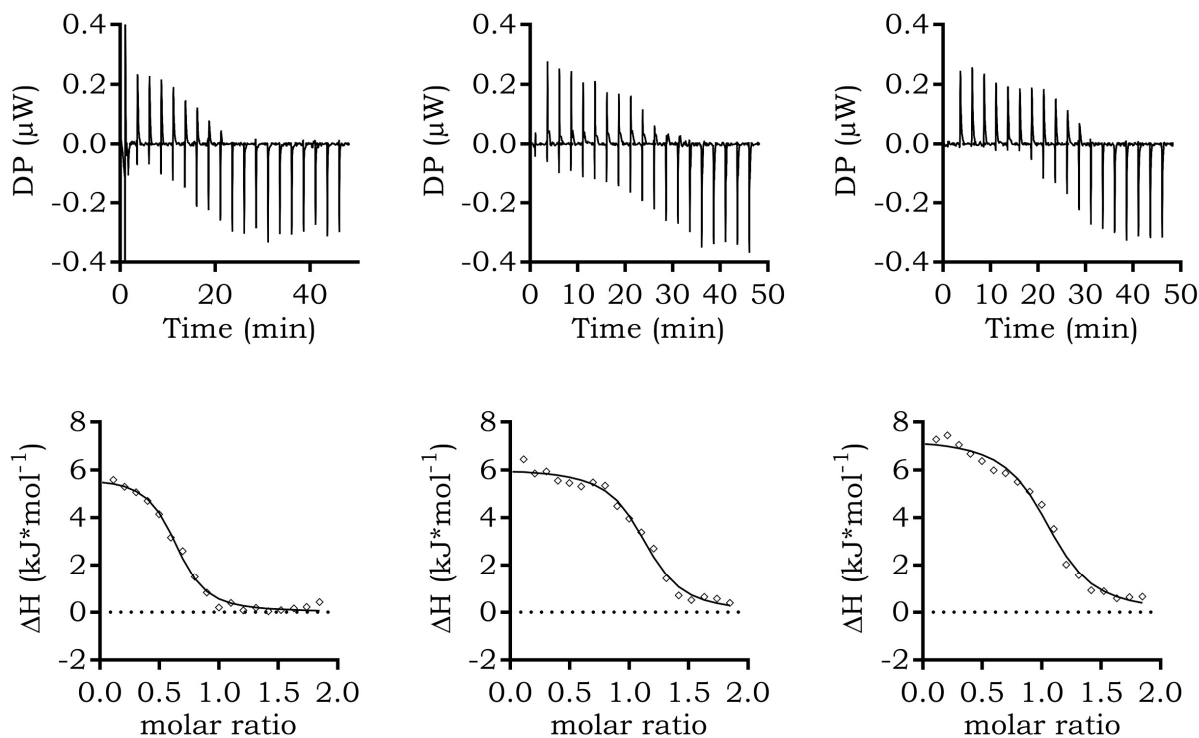

HEPES\_5\_MT-SP1\_1

Model: One Set of Sites

[Cell] (M) = 50.0e-6

[Syr] (M) = 500e-6

N (sites) =  $0.623 \pm 1.4e-2$ KD (M) =  $1.33e-6 \pm 322e-9$  $\Delta H$  (kJ/mol) =  $5.71 \pm 0.232$ Offset (kJ/mol) =  $-2.14 \pm 8.8e-2$  $\Delta G$  (kJ/mol) = -33.6-T $\Delta S$  (kJ/mol) = -39.3

HEPES\_5\_MT-SP1\_2

Model: One Set of Sites

[Cell] (M) = 50.0e-6

[Syr] (M) = 500e-6

N (sites) =  $1.11 \pm 2.7e-2$ KD (M) =  $1.17e-6 \pm 363e-9$  $\Delta H$  (kJ/mol) =  $6.05 \pm 0.343$ Offset (kJ/mol) =  $-3.08 \pm 0.235$  $\Delta G$  (kJ/mol) = -33.9-T $\Delta S$  (kJ/mol) = -39.9

HEPES\_5\_MT-SP1\_3

Model: One Set of Sites

[Cell] (M) = 50.0e-6

[Syr] (M) = 500e-6

N (sites) =  $1.05 \pm 2.9e-2$ KD (M) =  $1.76e-6 \pm 507e-9$  $\Delta H$  (kJ/mol) =  $7.32 \pm 0.430$ Offset (kJ/mol) =  $-2.94 \pm 0.272$  $\Delta G$  (kJ/mol) = -32.9-T $\Delta S$  (kJ/mol) = -40.2Figure S5G. Thermograms and isotherms of cpd 5 vs. MT-SP1 in ITC<sub>HEPES</sub> buffer.

## ITC experiments of cpd. 5 vs. MT-SP1 in TRIS.

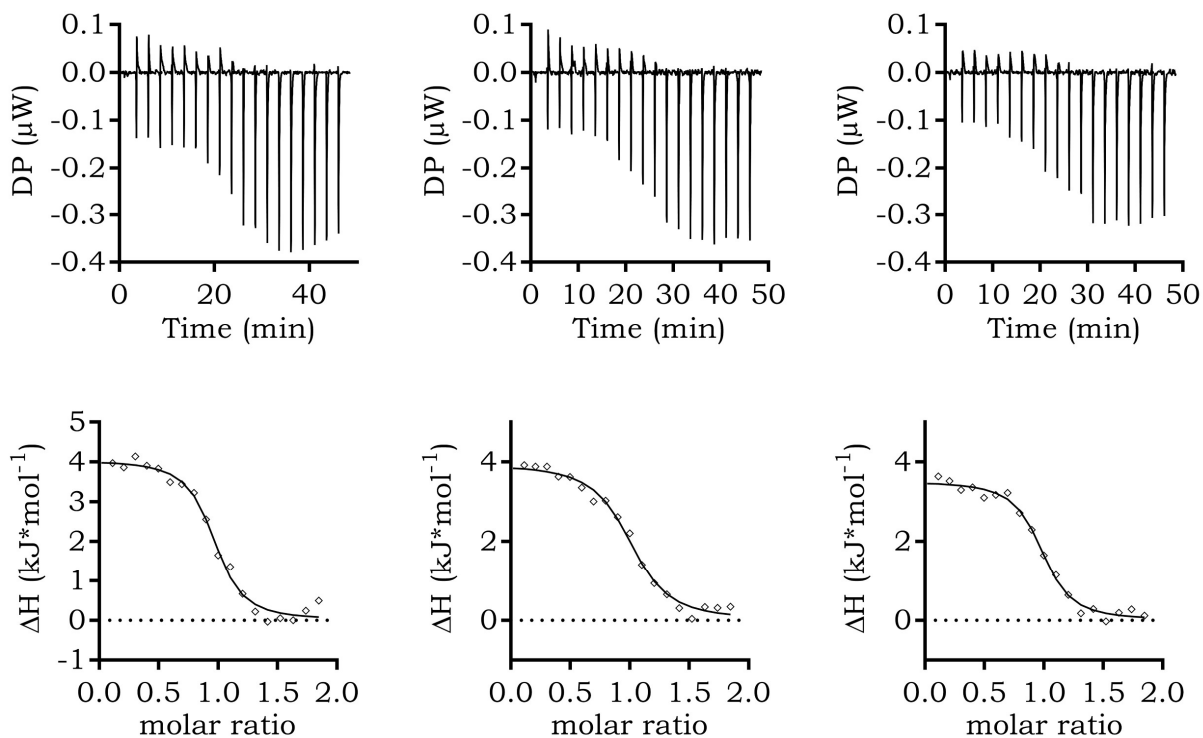

TRIS\_5\_MT-SP1\_1

Model: One Set of Sites

[Cell] (M) = 50.0e-6

[Syr] (M) = 500e-6

N (sites) = 0.938 ± 2.0e-2

KD (M) = 777e-9 ± 255e-9

 $\Delta H$  (kJ/mol) = 4.05 ± 0.188

Offset (kJ/mol) = -2.76 ± 0.114

 $\Delta G$  (kJ/mol) = -34.9-T $\Delta S$  (kJ/mol) = -39.0

TRIS\_5\_MT-SP1\_2

Model: One Set of Sites

[Cell] (M) = 50.0e-6

[Syr] (M) = 500e-6

N (sites) = 0.991 ± 2.3e-2

KD (M) = 1.35e-6 ± 378e-9

 $\Delta H$  (kJ/mol) = 3.95 ± 0.197

Offset (kJ/mol) = -2.43 ± 0.120

 $\Delta G$  (kJ/mol) = -33.5-T $\Delta S$  (kJ/mol) = -37.5

TRIS\_5\_MT-SP1\_3

Model: One Set of Sites

[Cell] (M) = 50.0e-6

[Syr] (M) = 500e-6

N (sites) = 0.956 ± 1.7e-2

KD (M) = 801e-9 ± 212e-9

 $\Delta H$  (kJ/mol) = 3.52 ± 0.135

Offset (kJ/mol) = -2.25 ± 8.3e-2

 $\Delta G$  (kJ/mol) = -34.8-T $\Delta S$  (kJ/mol) = -38.3Figure S5H. Thermograms and isotherms of cpd 5 vs. MT-SP1 in ITC<sub>TRIS</sub> buffer.

## ITC experiments of cpd. 6 vs. MT-SP1 in HEPES.

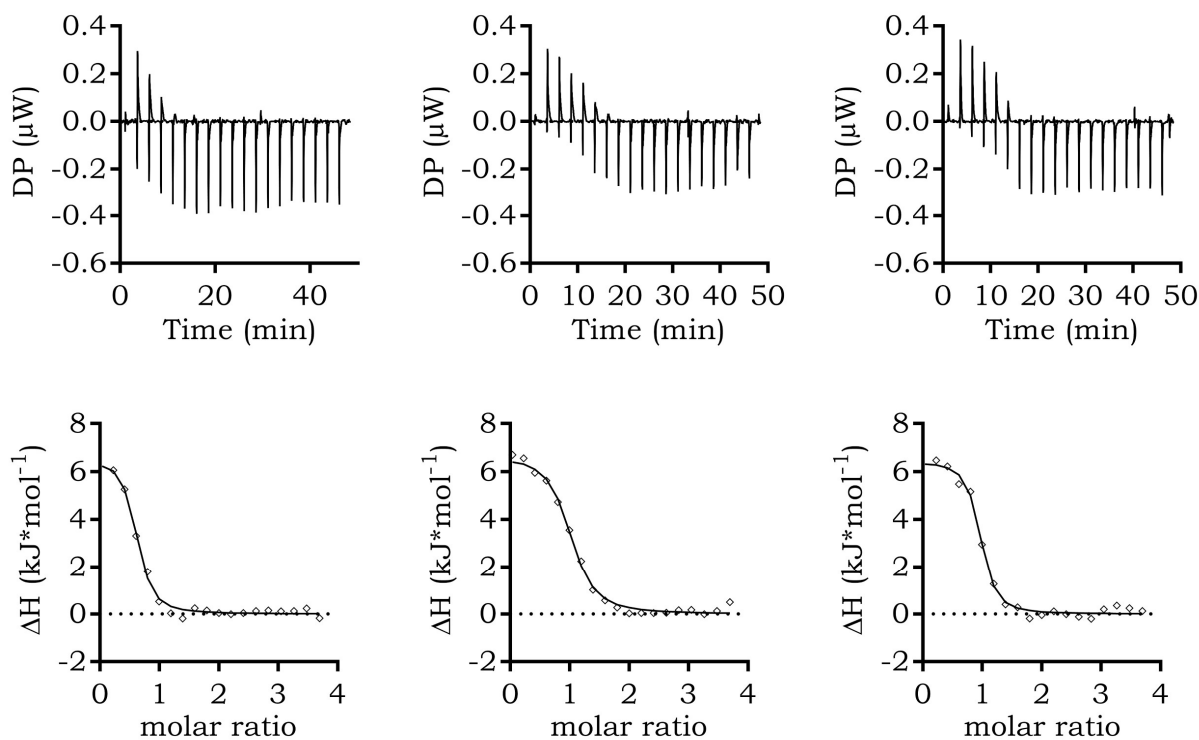

HEPES\_6\_MT-SP1\_1

Model: One Set of Sites

[Cell] (M) = 25.0e-6

[Syr] (M) = 500e-6

N (sites) = 0.558 ± 1.8e-2

KD (M) = 781e-9 ± 219e-9

ΔH (kJ/mol) = 6.60 ± 0.329

Offset (kJ/mol) = -2.02 ± 5.9e-2

ΔG (kJ/mol) = -34.9

-TΔS (kJ/mol) = -41.5

HEPES\_6\_MT-SP1\_2

Model: One Set of Sites

[Cell] (M) = 25.0e-6

[Syr] (M) = 500e-6

N (sites) = 0.967 ± 2.0e-2

KD (M) = 1.07e-6 ± 228e-9

ΔH (kJ/mol) = 6.69 ± 0.233

Offset (kJ/mol) = -2.04 ± 7.1e-2

ΔG (kJ/mol) = -34.1

-TΔS (kJ/mol) = -40.8

HEPES\_6\_MT-SP1\_3

Model: One Set of Sites

[Cell] (M) = 25.0e-6

[Syr] (M) = 500e-6

N (sites) = 0.901 ± 1.7e-2

KD (M) = 420e-9 ± 119e-9

ΔH (kJ/mol) = 6.43 ± 0.208

Offset (kJ/mol) = -2.04 ± 7.1e-2

ΔG (kJ/mol) = -36.4

-TΔS (kJ/mol) = -42.9

Figure S51. Thermograms and isotherms of cpd 6 vs. MT-SP1 in ITC<sub>HEPES</sub> buffer.

## ITC experiments of cpd. 6 vs. MT-SP1 in TRIS.

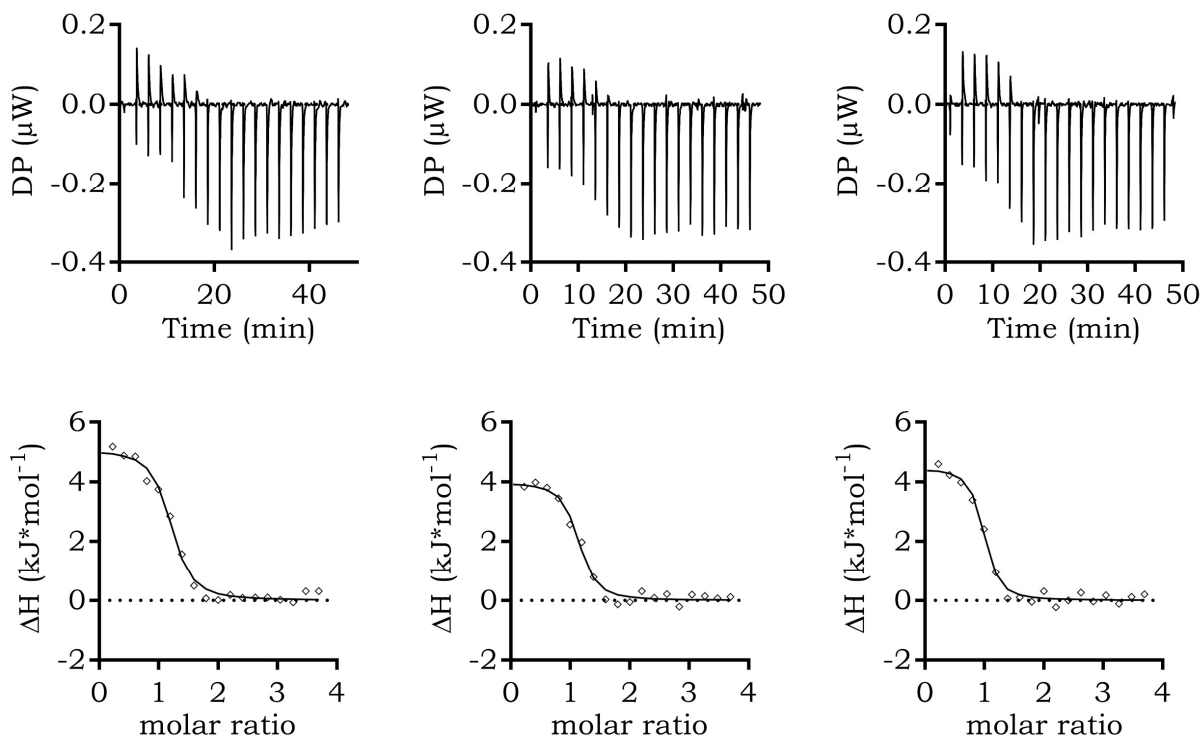

TRIS\_6\_MT-SP1\_1

Model: One Set of Sites

[Cell] (M) = 25.0e-6

[Syr] (M) = 500e-6

N (sites) =  $1.15 \pm 2.7e-2$ KD (M) =  $644e-9 \pm 205e-9$  $\Delta H$  (kJ/mol) =  $5.08 \pm 0.209$ Offset (kJ/mol) =  $-2.67 \pm 8.3e-2$  $\Delta G$  (kJ/mol) = -35.4-T $\Delta S$  (kJ/mol) = -40.5

TRIS\_6\_MT-SP1\_2

Model: One Set of Sites

[Cell] (M) = 25.0e-6

[Syr] (M) = 500e-6

N (sites) =  $1.07 \pm 3.0e-2$ KD (M) =  $497e-9 \pm 203e-9$  $\Delta H$  (kJ/mol) =  $3.99 \pm 0.193$ Offset (kJ/mol) =  $-2.21 \pm 7.5e-2$  $\Delta G$  (kJ/mol) = -36.0-T $\Delta S$  (kJ/mol) = -40.0

TRIS\_6\_MT-SP1\_3

Model: One Set of Sites

[Cell] (M) = 25.0e-6

[Syr] (M) = 500e-6

N (sites) =  $0.922 \pm 2.2e-2$ KD (M) =  $409e-9 \pm 151e-9$  $\Delta H$  (kJ/mol) =  $4.46 \pm 0.185$ Offset (kJ/mol) =  $-2.07 \pm 6.5e-2$  $\Delta G$  (kJ/mol) = -36.5-T $\Delta S$  (kJ/mol) = -41.0Figure S5J. Thermograms and isotherms of cpd 6 vs. MT-SP1 in ITC<sub>TRIS</sub> buffer.

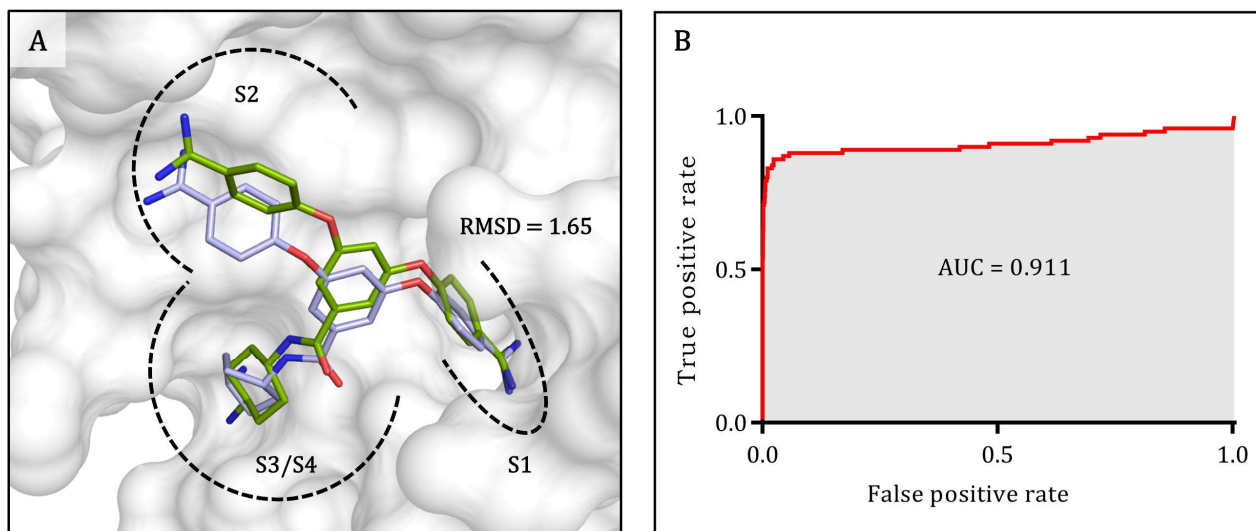

Figure S6. Docking validation. **A** redocking of cpd **15** (PDB ID 4O9V)(1) reveals an RMSD of 1.65 Å (X-ray: green sticks, redocked pose: pale blue sticks, FlexX score  $-53.9 \text{ kJ}\cdot\text{mol}^{-3}$ ). **B** ROC-curves of the 100 binders and 1170 decoys for validation of the molecular docking studies.

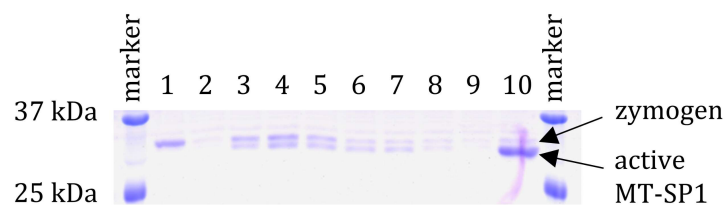

Figure S7. SDS-PAGE analysis of the MT-SP1 purification and autoactivation process. Precision Plus Protein™ Dual Xtra Prestained Protein Standards (BioRad, Hercules, CA, USA) was used as a molecular weight marker. Protein bands were stained with Coomassie brilliant blue. Lane 1 contains the MT-SP1 after Ni-NTA and subsequent dialysis, which was loaded to the AEX column. Lanes 2–9 show the respective elution fractions. Lane 10 contains a sample of the pooled and concentrated MT-SP1. In lane 1, there is mainly the zymogen, whereas autoactivation occurs during AEX. After concentrating of the eluted fractions, the active MT-SP1 is prevailing.



Table S1. Symmetry point groups of inhibitors 1–6. The assignment was performed as described in Lauria *et al.*(6)

| Cpd | Structure                                                                           | Symmetry point group                                                                  |
|-----|-------------------------------------------------------------------------------------|---------------------------------------------------------------------------------------|
| 1   | 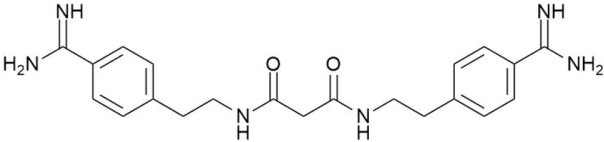   |    |
| 2   |    |     |
| 3   |   |    |
| 4   |  |  |
| 5   |  |  |
| 6   |  |   |

Table S2. FlexX docking scores for poses resembling possible solutions. Predicted binding modes are shown in Figure 2.

| Cpd | Rank | Docking score<br>(kJ·mol <sup>-1</sup> ) | orientation                                                                         |
|-----|------|------------------------------------------|-------------------------------------------------------------------------------------|
| 1   | 1    | -43.6                                    | 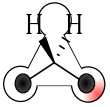   |
|     | 3    | -42.5                                    |    |
|     | 1    | -49.0                                    |    |
| 2   |      |                                          | (inconclusive binding mode)                                                         |
|     | 4    | -46.2                                    |    |
| 3   | 1    | -33.4                                    |   |
| 4   | 1    | -40.1                                    |  |
| 5   | 1    | -42.7                                    |  |
|     | 15   | -41.9                                    |  |
| 6   | 1    | -45.5                                    |  |

Table S3.  $K_M$  values of Boc-LRR-AMC, and  $IC_{50}$  and  $K_i$  values of **3–6** in dependence of buffer pH.

| Enzyme   | $K_M$ ( $\mu\text{M}$ ) <sup>a</sup> |               |               |               |               |
|----------|--------------------------------------|---------------|---------------|---------------|---------------|
|          | pH 7.0                               | pH 7.5        | pH 8.0        | pH 8.5        | pH 9.0        |
| MT-SP1   | 255 ± 37                             | 201 ± 33      | 39.1 ± 5.1    | 65.9 ± 6.2    | 55.0 ± 5.0    |
| Cpd      | $IC_{50}$ ( $\mu\text{M}$ )          |               |               |               |               |
|          | pH 7.0                               | pH 7.5        | pH 8.0        | pH 8.5        | pH 9.0        |
| <b>3</b> | 104 ± 8                              | 61.4 ± 5.3    | 65.3 ± 3.6    | 50.6 ± 4.0    | 71.8 ± 10.7   |
| <b>4</b> | n.d.                                 | n.d.          | 2.46 ± 0.29   | n.d.          | n.d.          |
| <b>5</b> | n.d.                                 | n.d.          | 1.46 ± 0.10   | n.d.          | n.d.          |
| <b>6</b> | 0.589 ± 0.048                        | 1.37 ± 0.06   | 1.42 ± 0.08   | 0.680 ± 0.051 | 0.910 ± 0.057 |
| Cpd      | $K_i$ ( $\mu\text{M}$ )              |               |               |               |               |
|          | pH 7.0                               | pH 7.5        | pH 8.0        | pH 8.5        | pH 9.0        |
| <b>3</b> | 77.9 ± 6.7                           | 43.1 ± 4.3    | 18.4 ± 2.0    | 22.1 ± 2.1    | 28.2 ± 4.5    |
| <b>4</b> | n.d.                                 | n.d.          | 0.775 ± 0.115 | n.d.          | n.d.          |
| <b>5</b> | n.d.                                 | n.d.          | 0.459 ± 0.051 | n.d.          | n.d.          |
| <b>6</b> | 0.440 ± 0.039                        | 0.961 ± 0.064 | 0.398 ± 0.043 | 0.297 ± 0.027 | 0.358 ± 0.030 |

a: substrate BOC-LRR-AMC. n.d.: not determined.

Table S4. ITC results including errors from direct titrations. Experiments were performed at least in triplicates.

| Ligand   | buffer | N           | $K_d$ ( $\mu\text{M}$ ) | $\Delta G_{\text{obs}}$ ( $\text{kJ}\cdot\text{mol}^{-1}$ ) | $\Delta H_{\text{obs}}$ ( $\text{kJ}\cdot\text{mol}^{-1}$ ) | $-\Delta S_{\text{obs}}$ ( $\text{kJ}\cdot\text{mol}^{-1}$ ) |
|----------|--------|-------------|-------------------------|-------------------------------------------------------------|-------------------------------------------------------------|--------------------------------------------------------------|
| <b>1</b> | TRIS   | 0.59 ± 0.01 | 1.45 ± 0.19             | -33.4 ± 0.2                                                 | -14.0 ± 0.5                                                 | -19.4 ± 0.4                                                  |
| <b>2</b> | TRIS   | 0.84 ± 0.02 | 0.392 ± 0.121           | -36.9 ± 1.2                                                 | -6.8 ± 0.3                                                  | -30.1 ± 1.3                                                  |
| <b>3</b> | HEPES  | 0.88 ± 0.06 | 12.7 ± 2.2              | -28.1 ± 0.8                                                 | 4.4 ± 0.3                                                   | -32.6 ± 0.8                                                  |
|          | TRIS   | 1.15 ± 0.03 | 7.76 ± 0.94             | -29.6 ± 1.5                                                 | 3.5 ± 0.1                                                   | -33.0 ± 1.0                                                  |
| <b>4</b> | HEPES  | 0.69 ± 0.02 | 2.50 ± 0.44             | -32.1 ± 0.5                                                 | 7.4 ± 0.6                                                   | -39.4 ± 1.2                                                  |
|          | TRIS   | 0.65 ± 0.02 | 2.53 ± 0.60             | -32.0 ± 0.5                                                 | 5.8 ± 0.3                                                   | -37.9 ± 0.6                                                  |
| <b>5</b> | HEPES  | 0.93 ± 0.01 | 1.42 ± 0.23             | -33.5 ± 0.4                                                 | 6.4 ± 0.2                                                   | -39.8 ± 0.4                                                  |
|          | TRIS   | 0.96 ± 0.01 | 0.976 ± 0.168           | -34.4 ± 0.6                                                 | 3.8 ± 0.1                                                   | -38.3 ± 0.6                                                  |
| <b>6</b> | HEPES  | 0.81 ± 0.01 | 0.757 ± 0.113           | -35.1 ± 1.0                                                 | 6.6 ± 0.2                                                   | -41.7 ± 0.9                                                  |
|          | TRIS   | 1.05 ± 0.02 | 0.517 ± 0.109           | -36.0 ± 0.5                                                 | 4.5 ± 0.1                                                   | -40.5 ± 0.4                                                  |

Table S5. Comparison of calculated ( $\Delta\Delta G_{\text{calc}}$ ) and experimental ( $\Delta\Delta G_{\text{ITC}}$ ) changes in  $\Delta G$ , assuming equal  $K_{a,\text{inc}}$  for inhibitors 4–6.

| Cpd | Qualitative binding mode<br>affinity comparison                                                              | Estimated incremental affinity $K_{a,\text{inc}}$<br>( $\mu\text{M}$ )                                         | $\Delta\Delta G_{\text{calc}}$<br>( $\text{kJ}\cdot\text{mol}^{-1}$ )                                                                                                                                | $\Delta\Delta G_{\text{ITC}}$<br>( $\text{kJ}\cdot\text{mol}^{-1}$ ) | $\Delta-T\Delta S_{\text{ITC}}$<br>( $\text{kJ}\cdot\text{mol}^{-1}$ ) |
|-----|--------------------------------------------------------------------------------------------------------------|----------------------------------------------------------------------------------------------------------------|------------------------------------------------------------------------------------------------------------------------------------------------------------------------------------------------------|----------------------------------------------------------------------|------------------------------------------------------------------------|
| 3   | $[\text{PL}]_1 = [\text{PL}]_2 = [\text{PL}]_3$<br>$= [\text{PL}]_4 = [\text{PL}]_5 = [\text{PL}]_6$         | $K_{a,\text{app}} = K_{a,1} = K_{a,2} = K_{a,3} = K_{a,4}$<br>$= K_{a,5} = K_{a,6} = 6 \cdot K_{a,\text{inc}}$ |                                                                                                                                                                                                      |                                                                      |                                                                        |
| 4   | $[\text{PL}]_1 = [\text{PL}]_2 \gg [\text{PL}]_3$<br>$= [\text{PL}]_4 \approx [\text{PL}]_5 = [\text{PL}]_6$ | $K_{a,\text{app}} = K_{a,1} = K_{a,2} = 2 \cdot K_{a,\text{inc}}$                                              | $\Delta\Delta G_{4 \rightarrow 5}$<br>$-\text{RT} \cdot \ln(2 \cdot K_{a,\text{inc}}) - (-\text{RT} \cdot \ln(4 \cdot K_{a,\text{inc}}))$<br>$= -\text{RT} \cdot \ln\left(\frac{4}{2}\right) = -1.7$ | -1.8                                                                 | -1.6                                                                   |
| 5   | $[\text{PL}]_1 = [\text{PL}]_2 = [\text{PL}]_3$<br>$= [\text{PL}]_4 \gg [\text{PL}]_5 = [\text{PL}]_6$       | $K_{a,\text{app}} = K_{a,1} = K_{a,2} = K_{a,3} = K_{a,4}$<br>$= 4 \cdot K_{a,\text{inc}}$                     |                                                                                                                                                                                                      |                                                                      |                                                                        |
| 6   | $[\text{PL}]_1 = [\text{PL}]_2 = [\text{PL}]_3$<br>$= [\text{PL}]_4 = [\text{PL}]_5 = [\text{PL}]_6$         | $K_{a,\text{app}} = K_{a,1} = K_{a,2} = K_{a,3} = K_{a,4}$<br>$= K_{a,5} = K_{a,6} = 6 \cdot K_{a,\text{inc}}$ | $\Delta\Delta G_{5 \rightarrow 6}$<br>$-\text{RT} \cdot \ln(4 \cdot K_{a,\text{inc}}) - (-\text{RT} \cdot \ln(6 \cdot K_{a,\text{inc}}))$<br>$= -\text{RT} \cdot \ln\left(\frac{6}{4}\right) = -1.0$ | -1.7                                                                 | -1.5                                                                   |

Table S6. Used concentrations for direct titrations.

| Cpd | Cell ( $\mu\text{M}$ ) | Syringe ( $\mu\text{M}$ ) |
|-----|------------------------|---------------------------|
| 1   | 15                     | 200                       |
| 2   | 15                     | 200                       |
| 3   | 50                     | 2000                      |
| 4   | 50                     | 500                       |
| 5   | 50                     | 500                       |
| 6   | 25                     | 500                       |

## REFERENCES

- Goswami R, Mukherjee S, Ghadiyaram C, Wohlfahrt G, Sistla RK, Nagaraj J, et al. Structure-guided discovery of 1,3,5 tri-substituted benzenes as potent and selective matriptase inhibitors exhibiting in vivo antitumor efficacy. *Bioorg Med Chem* [Internet]. 2014 Jun;22(12):3187–203. Available from: <https://linkinghub.elsevier.com/retrieve/pii/S0968089614002570>
- Jurrus E, Engel D, Star K, Monson K, Brandi J, Felberg LE, et al. Improvements to the <sc>APBS</sc> biomolecular solvation software suite. *Protein Sci* [Internet]. 2018 Jan 24;27(1):112–28. Available from: <https://onlinelibrary.wiley.com/doi/10.1002/pro.3280>
- The PyMOL Molecular Graphics System [Internet]. Vol. 40, CCP4 Newsletter On Protein Crystallography. Schrödinger; 2002. p. 82–92. Available from: <http://www.pymol.org>
- Robin J. Leatherbarrow. GraFit 6 [Internet]. East Grinstead, West Sussex, U.K.: Erithacus Software Limited; 2007. Available from: <http://erithacus.com/grafit/>
- Marvin 21.19 [Internet]. Marvin 21.19. Budapest, Ungarn: ChemAxon (<http://www.chemaxon.com>); 2021. Available from: <http://www.chemaxon.com>
- Lauria A, Terenzi A, Bartolotta R, Bonsignore R, Perricone U, Tutone M, et al. Does Ligand Symmetry Play a Role in the Stabilization of DNA G-Quadruplex Host-Guest Complexes? *Curr Med Chem* [Internet]. 2014 Feb 17;21(23):2665–90. Available from: <http://www.eurekaselect.com/openurl/content.php?genre=article&issn=0929-8673&volume=21&issue=23&page=2665>

Spectral Appendix

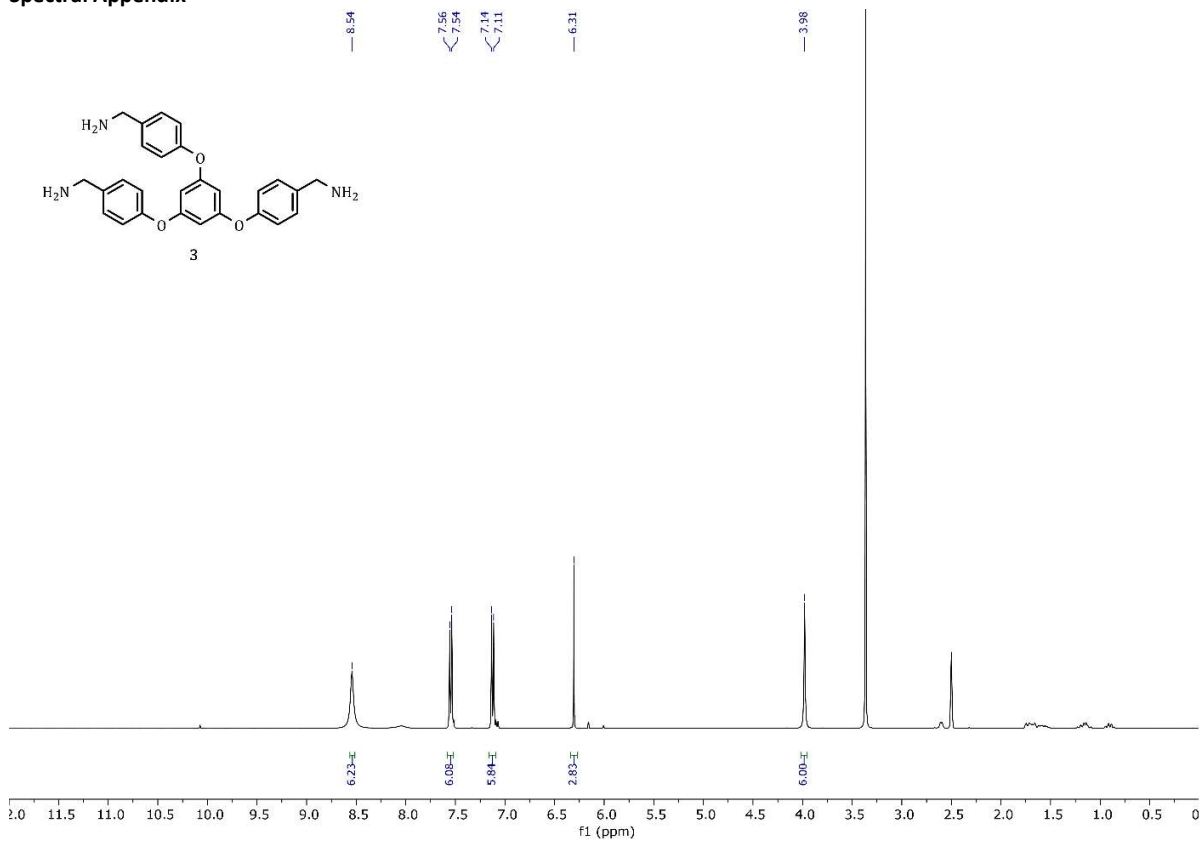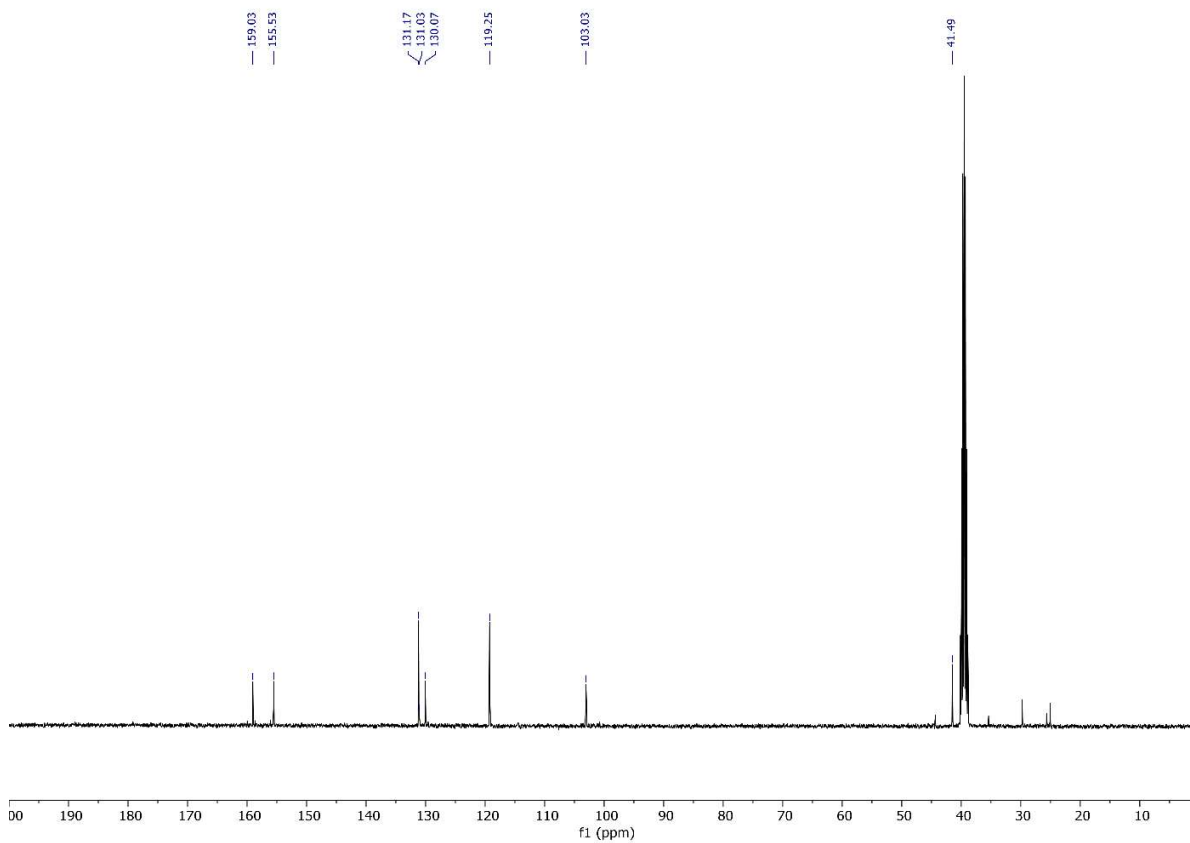

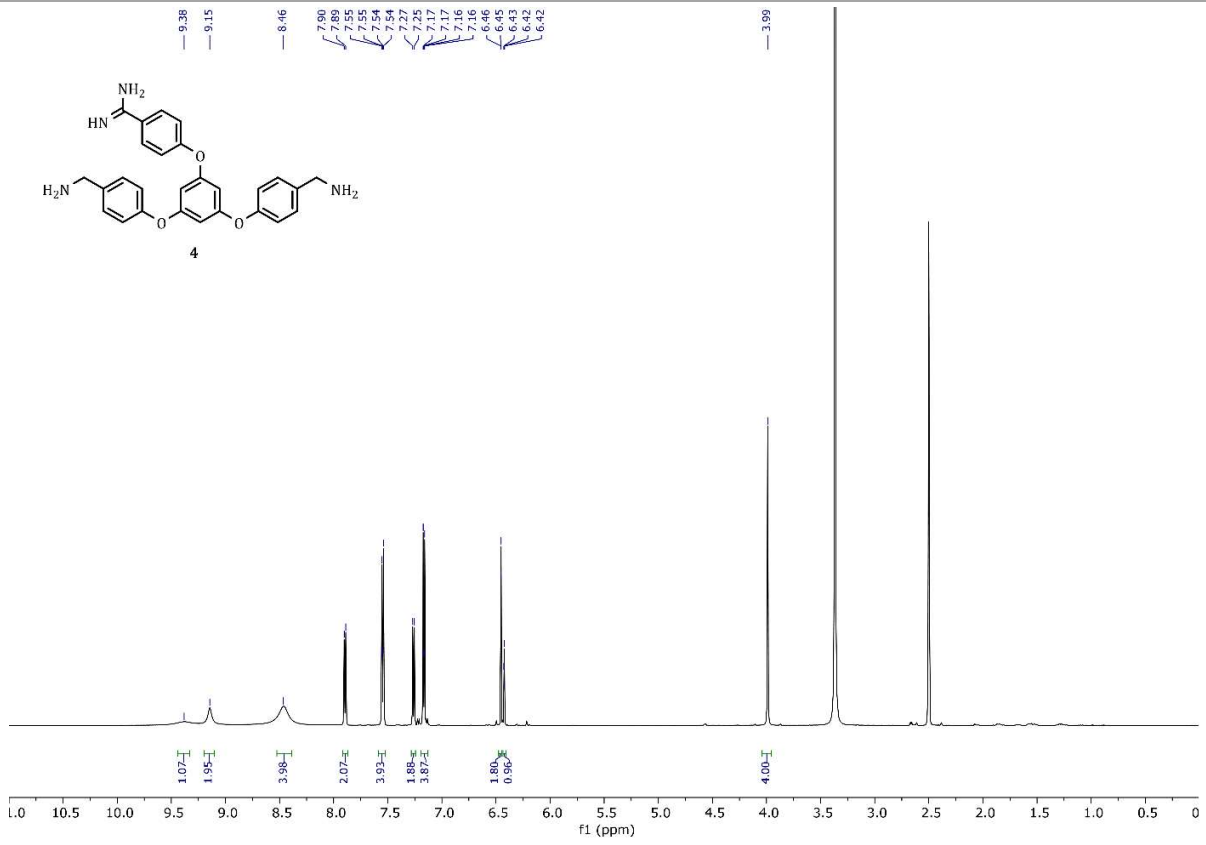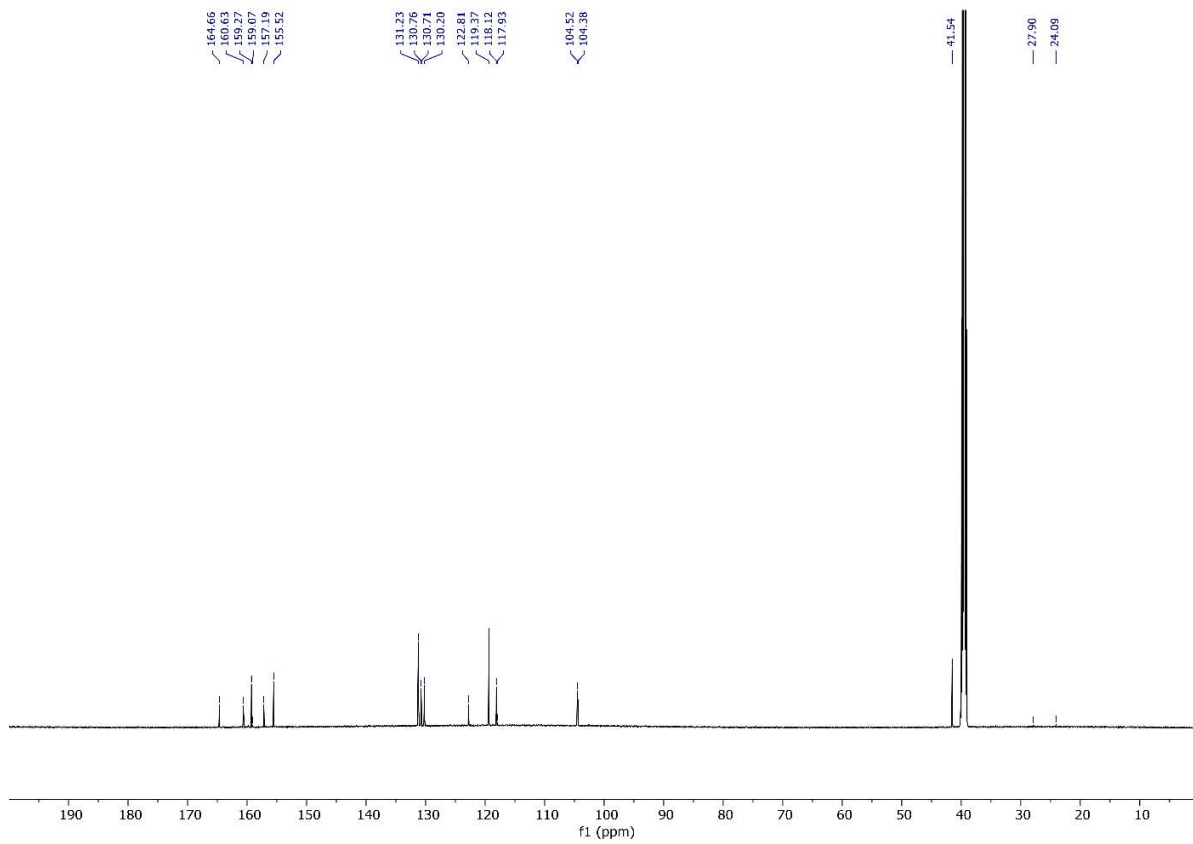

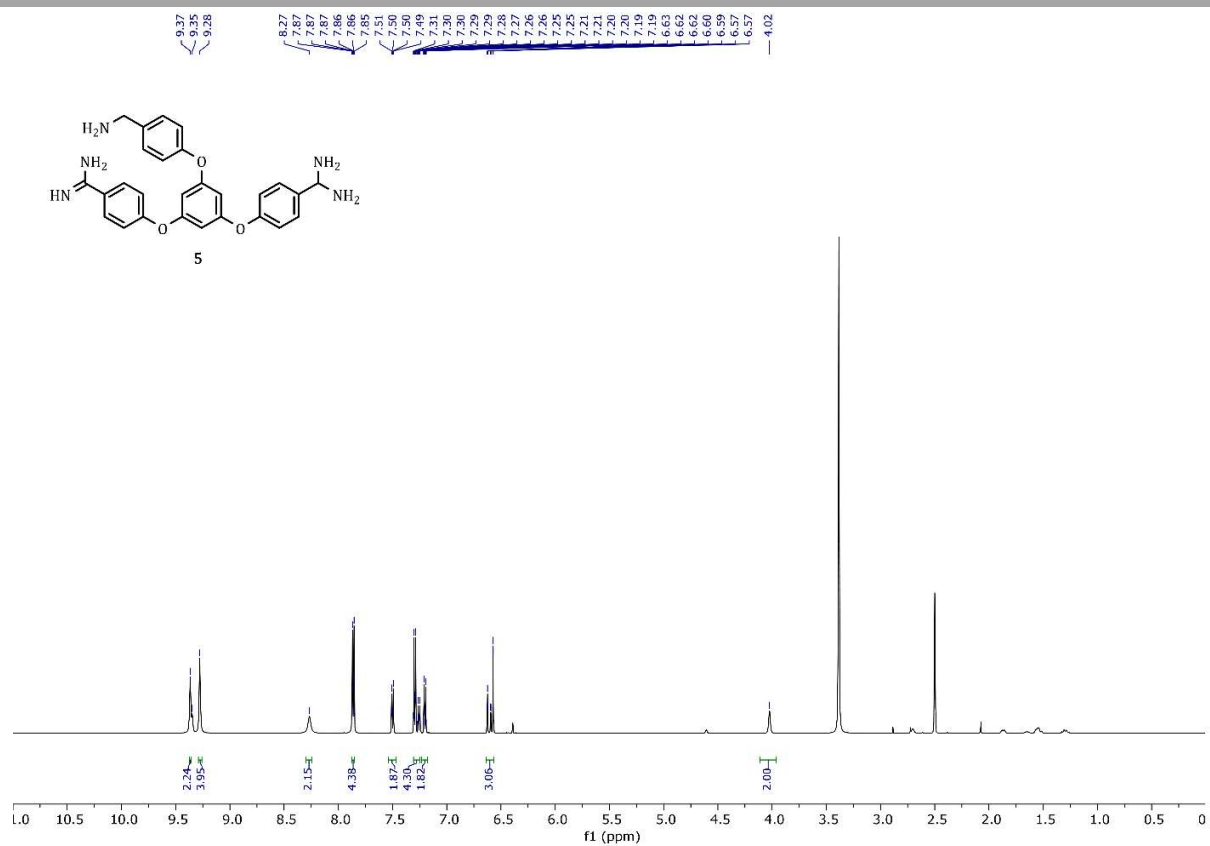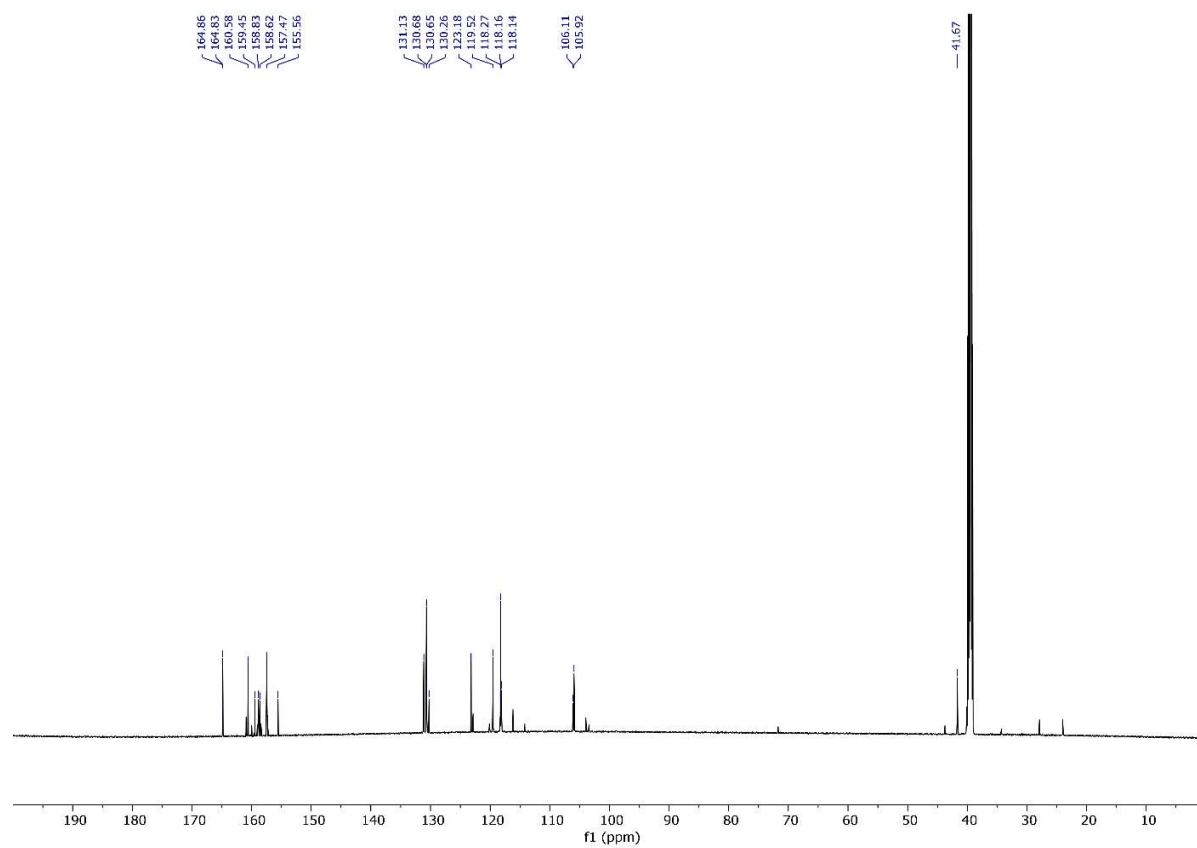

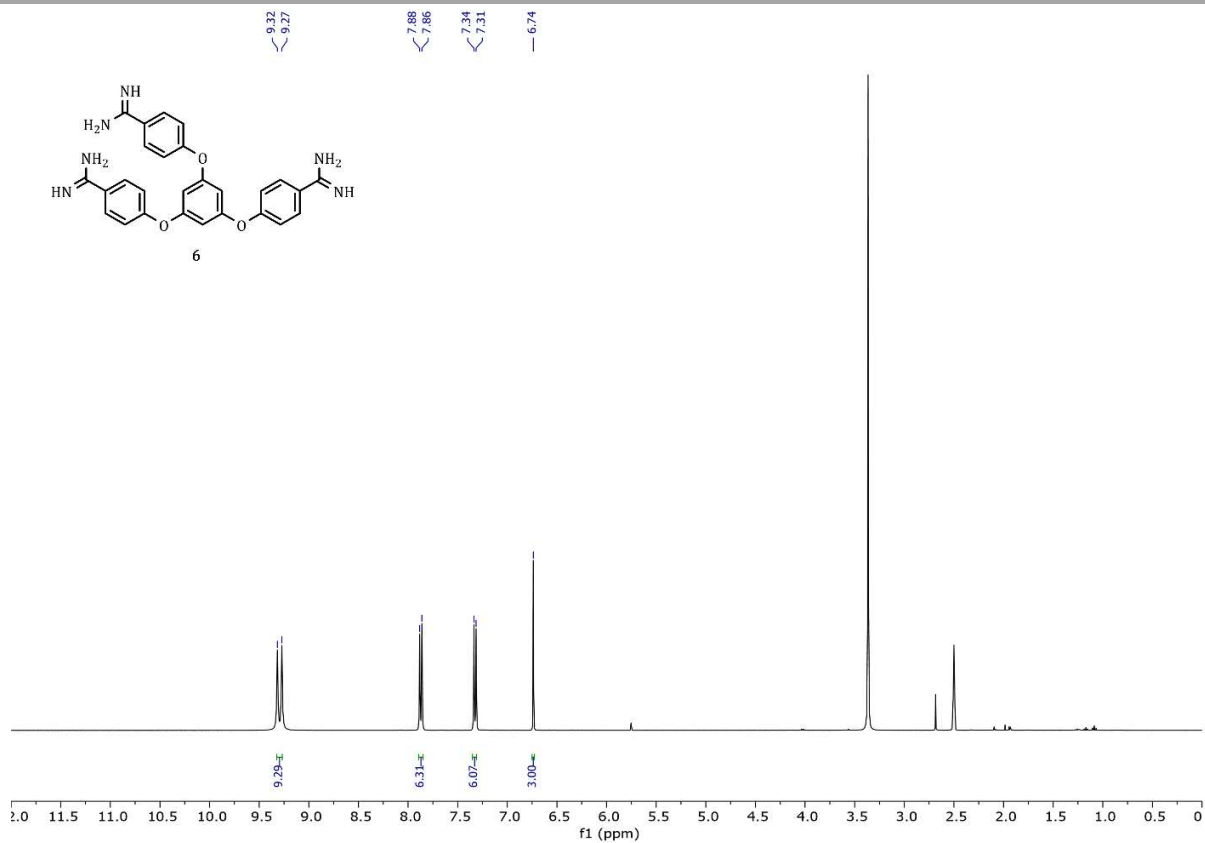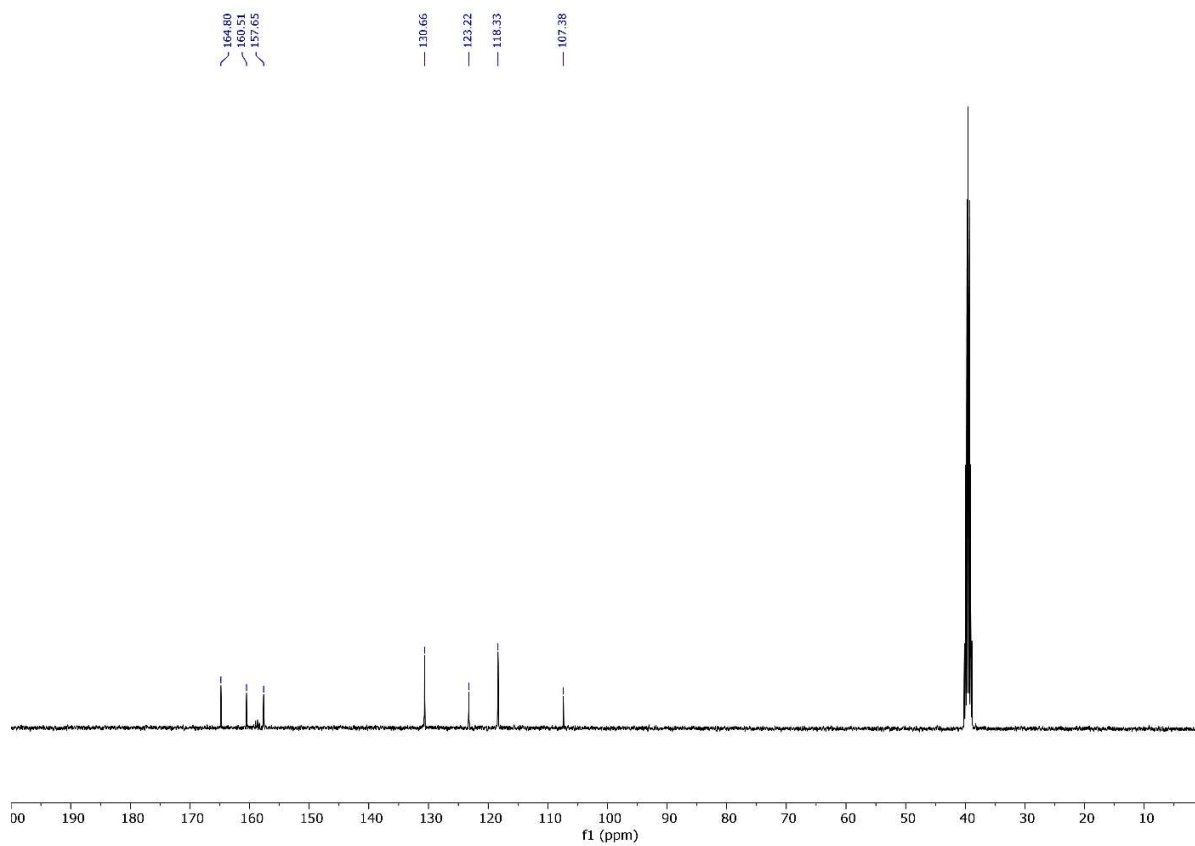

Supplement: d3md00125c1.pdf [file d3md00125c1.pdf]
